# Supplementary material
Source: publisher figshare collection journal article supplement (https://gsapubs.figshare.com/articles/dataset/_/12540611)
Supplement: Supplementary file 1 [file 1]

## Sheet: Sheet 1
staname	stalat	stalon	evdate	evlat	evlon	phase	phiSC err -	phiSC	phiSC err +	dtSC err -	dtSC	dtSC err +	SI err -	SI	SI err +	SIdiff	discrepant	PPlat CMB	PPlon CMB	misori	filter low	filter high
AAL	60.178	19.9936	04-Mar-2010	-22.23	-68.33	SKKS	NULL	NULL	NULL	NULL	NULL	NULL	0.149475	0.183133	0.216792	-	no	47.053	-18.6892	-	0.0766667	0.18
AAL	60.178	19.9936	04-Mar-2010	-22.23	-68.33	SKS	NULL	NULL	NULL	NULL	NULL	NULL	0.0871265	0.134771	0.182416	-	no	55.1407	-2.51161	-	0.0766667	0.18
AAL	60.178	19.9936	21-Sep-2013	-7.26	119.96	SKKS	NULL	NULL	NULL	NULL	NULL	NULL	-0.150006	-0.0625602	0.0248852	-	no	52.4172	67.9784	-	0.0666667	0.2
AAL	60.178	19.9936	21-Sep-2013	-7.26	119.96	SKS	NULL	NULL	NULL	NULL	NULL	NULL	-0.159655	-0.0818666	-0.00407866	-	no	58.2134	48.8314	-	0.0666667	0.2
AAL	60.178	19.9936	28-May-2016	-56.2	-26.89	SKKS	NULL	NULL	NULL	NULL	NULL	NULL	-0.0139579	0.081188	0.176334	-	no	38.8809	6.04891	-	0.0666667	0.2
AAL	60.178	19.9936	28-May-2016	-56.2	-26.89	SKS	NULL	NULL	NULL	NULL	NULL	NULL	-0.213998	-0.155864	-0.0977303	-	no	51.3055	12.481	-	0.0666667	0.2
ARA0	69.5349	25.5058	07-May-2015	-7.23	154.55	SKKS	-7.07865	4.90191	19.2135	0.85	1.1	1.4	-0.632099	-0.522158	-0.412217	-	no	68.6596	102.551	-	0.0666667	0.26
ARA0	69.5349	25.5058	07-May-2015	-7.23	154.55	SKS	-7.07865	16.9019	33.3708	0.55	0.8	1.1	-0.704334	-0.659582	-0.614829	-	no	73.3686	64.3219	-	0.0666667	0.26
ARA0	69.5349	25.5058	25-Jul-2016	-26.11	-70.65	SKKS	NULL	NULL	NULL	NULL	NULL	NULL	-0.101155	-0.0684491	-0.0357431	-	no	57.5886	-24.2609	-	0.0666667	0.14
ARA0	69.5349	25.5058	25-Jul-2016	-26.11	-70.65	SKS	NULL	NULL	NULL	NULL	NULL	NULL	-0.14603	-0.105583	-0.0651347	-	no	66.2069	-2.57989	-	0.0666667	0.14
ARA0	69.5349	25.5058	31-Aug-2016	-3.69	152.79	SKKS	-3.03371	9.59014	21.236	0.85	1.05	1.25	-1.04549	-0.987032	-0.92857	-	no	68.1155	103.087	-	0.0666667	0.22
ARA0	69.5349	25.5058	31-Aug-2016	-3.69	152.79	SKS	-7.07865	1.59014	11.1236	0.9	1.05	1.25	-1.00183	-0.954617	-0.907405	-	no	73.1627	67.1233	-	0.0666667	0.22
ARA0	69.5349	25.5058	15-Apr-2017	-23.24	-67.65	SKKS	NULL	NULL	NULL	NULL	NULL	NULL	-0.277355	-0.121551	0.0342531	-	no	56.5956	-24.2322	-	0.0666667	0.2
ARA0	69.5349	25.5058	15-Apr-2017	-23.24	-67.65	SKS	NULL	NULL	NULL	NULL	NULL	NULL	-0.205755	-0.0601139	0.0855268	-	no	65.4963	-3.96669	-	0.0666667	0.2
ARBE	59.4365	25.9841	24-Aug-2011	-7.64	-74.53	SKKS	NULL	NULL	NULL	NULL	NULL	NULL	-0.231593	-0.164832	-0.0980711	-	no	51.8954	-21.5164	-	0.0666667	0.2
ARBE	59.4365	25.9841	24-Aug-2011	-7.64	-74.53	SKS	NULL	NULL	NULL	NULL	NULL	NULL	-0.227551	-0.159233	-0.0909141	-	no	57.579	-2.38821	-	0.0666667	0.2
ARBE	59.4365	25.9841	02-Sep-2011	-28.4	-63.07	SKKS	33.3708	43.8704	49.5506	0.8	1	1.2	-0.901155	-0.850851	-0.800548	0.608577	yes	46.4691	-9.34499	-	0.0666667	0.24
ARBE	59.4365	25.9841	02-Sep-2011	-28.4	-63.07	SKS	NULL	NULL	NULL	NULL	NULL	NULL	-0.191971	-0.0943622	0.00324628	0.608577	yes	54.6809	6.74289	-	0.0666667	0.24
ARBE	59.4365	25.9841	22-Nov-2011	-15.36	-65.09	SKKS	45.5056	56.9562	63.7079	0.8	1.1	1.4	-0.683072	-0.61334	-0.543609	0.350266	yes	47.9569	-15.4417	-	0.0666667	0.2
ARBE	59.4365	25.9841	22-Nov-2011	-15.36	-65.09	SKS	NULL	NULL	NULL	NULL	NULL	NULL	-0.193343	-0.124538	-0.0557325	0.350266	yes	55.1123	1.11308	-	0.0666667	0.2
ARE0	69.5349	25.5057	01-Jul-2001	-4.31	152.96	SKKS	1.01124	11.6078	21.236	1.05	1.25	1.5	-1.18255	-1.09454	-1.00654	-	no	68.0109	103.394	-	0.0666667	0.2
ARE0	69.5349	25.5057	01-Jul-2001	-4.31	152.96	SKS	1.01124	9.60776	17.191	0.75	0.85	0.95	-0.975118	-0.959684	-0.944249	-	no	73.1524	67.3519	-	0.0666667	0.2
ARE0	69.5349	25.5057	21-Mar-2005	-24.98	-63.47	SKKS	NULL	NULL	NULL	NULL	NULL	NULL	-0.210706	-0.145832	-0.0809584	-	no	55.6637	-21.189	-	0.0666667	0.2
ARE0	69.5349	25.5057	21-Mar-2005	-24.98	-63.47	SKS	NULL	NULL	NULL	NULL	NULL	NULL	0.0923493	0.195603	0.298856	-	no	64.8629	-2.27678	-	0.0666667	0.2
ARE0	69.5349	25.5057	21-May-2005	-3.29	-80.99	SKKS	NULL	NULL	NULL	NULL	NULL	NULL	-0.0214741	-0.00661241	0.00824929	-	no	60.3703	-40.5433	-	0.0666667	0.2
ARE0	69.5349	25.5057	21-May-2005	-3.29	-80.99	SKS	NULL	NULL	NULL	NULL	NULL	NULL	-0.00705774	0.0226149	0.0522876	-	no	67.6299	-18.8079	-	0.0666667	0.2
ARE0	69.5349	25.5057	03-Jul-2008	-23.37	-179.78	SKKS	NULL	NULL	NULL	NULL	NULL	NULL	0.111314	0.177948	0.244582	-	no	78.9266	103.726	-	0.0666667	0.2
ARE0	69.5349	25.5057	03-Jul-2008	-23.37	-179.78	SKS	NULL	NULL	NULL	NULL	NULL	NULL	-0.103456	-0.00929079	0.084874	-	no	75.7301	42.6088	-	0.0666667	0.2
ARE0	69.5349	25.5057	08-Jul-2008	-15.99	-71.75	SKKS	NULL	NULL	NULL	NULL	NULL	NULL	-0.153272	-0.098951	-0.04463	-	no	57.6037	-29.5952	-	0.0666667	0.2
ARE0	69.5349	25.5057	08-Jul-2008	-15.99	-71.75	SKS	NULL	NULL	NULL	NULL	NULL	NULL	-0.0203081	0.081904	0.184116	-	no	66.0034	-8.66431	-	0.0666667	0.2
ARE0	69.5349	25.5057	12-Jul-2009	-15.04	-70.44	SKKS	NULL	NULL	NULL	NULL	NULL	NULL	-0.0971325	-0.0115905	0.0739515	-	no	57.1739	-29.3402	-	0.0666667	0.2
ARE0	69.5349	25.5057	12-Jul-2009	-15.04	-70.44	SKS	NULL	NULL	NULL	NULL	NULL	NULL	-0.0503037	0.00855974	0.0674231	-	no	65.6563	-9.1126	-	0.0666667	0.2
ARE0	69.5349	25.5057	04-Mar-2010	-22.23	-68.33	SKKS	NULL	NULL	NULL	NULL	NULL	NULL	-0.187366	-0.0652613	0.0568438	-	no	56.7573	-25.0282	-	0.0666667	0.2
ARE0	69.5349	25.5057	04-Mar-2010	-22.23	-68.33	SKS	NULL	NULL	NULL	NULL	NULL	NULL	-0.151575	-0.0224162	0.106743	-	no	65.5871	-4.58539	-	0.0666667	0.2
ARE0	69.5349	25.5057	12-Jul-2010	-22.15	-68.2	SKKS	NULL	NULL	NULL	NULL	NULL	NULL	0.000831119	0.0536235	0.106416	-	no	56.7213	-24.9941	-	0.0666667	0.2
ARE0	69.5349	25.5057	12-Jul-2010	-22.15	-68.2	SKS	NULL	NULL	NULL	NULL	NULL	NULL	-0.241065	-0.197964	-0.154863	-	no	65.56	-4.60573	-	0.0666667	0.2
ARE0	69.5349	25.5057	29-Jul-2011	-23.78	179.76	SKKS	NULL	NULL	NULL	NULL	NULL	NULL	-0.104856	-0.0594292	-0.0140025	-	no	78.7059	103.255	-	0.0666667	0.2
ARE0	69.5349	25.5057	29-Jul-2011	-23.78	179.76	SKS	NULL	NULL	NULL	NULL	NULL	NULL	-0.0676581	-0.0314008	0.00485652	-	no	75.6349	42.7336	-	0.0666667	0.2
ARE0	69.5349	25.5057	21-Jul-2014	-19.78	-178.44	SKKS	NULL	NULL	NULL	NULL	NULL	NULL	-0.00445926	0.0632193	0.130898	-	no	79.607	108.04	-	0.0666667	0.2
ARE0	69.5349	25.5057	21-Jul-2014	-19.78	-178.44	SKS	NULL	NULL	NULL	NULL	NULL	NULL	0.066021	0.139314	0.212607	-	no	76.3725	43.304	-	0.0666667	0.2
ASKU	58.8946	14.8288	31-Aug-2016	-3.69	152.79	SKKS	NULL	NULL	NULL	NULL	NULL	NULL	-0.221158	-0.177372	-0.133586	-	no	67.3255	66.6864	-	0.0666667	0.2
ASKU	58.8946	14.8288	31-Aug-2016	-3.69	152.79	SKS	NULL	NULL	NULL	NULL	NULL	NULL	0.121039	0.179358	0.237677	-	no	64.9907	34.3207	-	0.0666667	0.2
BACU	59.854	17.1078	06-Apr-2013	-3.52	138.48	SKKS	NULL	NULL	NULL	NULL	NULL	NULL	-0.137674	-0.00932416	0.119026	-	no	60.98	71.1532	-	0.0666667	0.2
BACU	59.854	17.1078	06-Apr-2013	-3.52	138.48	SKS	NULL	NULL	NULL	NULL	NULL	NULL	-0.29439	-0.192879	-0.0913686	-	no	63.1743	43.6902	-	0.0666667	0.2
BACU	59.854	17.1078	04-Aug-2016	-22.33	-66	SKKS	NULL	NULL	NULL	NULL	NULL	NULL	-0.0512736	0.0961478	0.243569	-	no	45.1239	-19.7647	-	0.0666667	0.2
BACU	59.854	17.1078	04-Aug-2016	-22.33	-66	SKS	NULL	NULL	NULL	NULL	NULL	NULL	-0.222024	-0.118165	-0.0143057	-	no	53.6352	-5.14733	-	0.0666667	0.2
BER	60.3838	5.33483	24-Oct-2009	-6.13	130.38	SKKS	NULL	NULL	NULL	NULL	NULL	NULL	-0.157209	-0.0704325	0.0163439	-	no	62.5604	59.3455	-	0.0666667	0.2
BER	60.3838	5.33483	24-Oct-2009	-6.13	130.38	SKS	NULL	NULL	NULL	NULL	NULL	NULL	-0.246858	-0.15877	-0.0706827	-	no	64.096	30.0515	-	0.0666667	0.2
BJUU	56.074	13.023	21-Sep-2013	-7.26	119.96	SKKS	-87.9775	-76.113	-67.7528	1.12	1.66	2.24	0.548988	0.741927	0.934867	-	no	51.9676	57.9379	-	0.0666667	0.2
BJUU	56.074	13.023	21-Sep-2013	-7.26	119.96	SKS	-90	-84.113	-83.9326	1.62	1.96	2.22	0.581576	0.696384	0.811192	-	no	56.0596	37.4294	-	0.0666667	0.2
BLEU	56.304	15.8145	21-Sep-2013	-7.26	119.96	SKKS	-59.6629	-47.7896	-39.4382	0.92	1.12	1.34	0.962338	1.03517	1.10801	-	no	51.0908	60.5467	-	0.0666667	0.2
BLEU	56.304	15.8145	21-Sep-2013	-7.26	119.96	SKS	-67.7528	-57.7896	-51.573	1.02	1.2	1.38	1.19828	1.26592	1.33356	-	no	55.6373	40.9344	-	0.0666667	0.2
BLEU	56.304	15.8145	23-Aug-2016	-7.28	122.45	SKKS	-41.4607	-29.9051	-25.2809	1.22	1.82	2.44	0.696187	0.851419	1.00665	-	no	52.0226	60.9512	-	0.0666667	0.2
BLEU	56.304	15.8145	23-Aug-2016	-7.28	122.45	SKS	-41.4607	-33.9051	-31.3483	1.12	1.34	1.58	0.893061	0.976376	1.05969	-	no	56.2099	40.4537	-	0.0666667	0.2
BLS5	59.4228	6.456	31-Aug-2016	-3.69	152.79	SKKS	-25.2809	-16.9663	-13.1461	1.74	2.04	2.38	-1.38096	-1.17561	-0.970272	-	no	71.2849	58.1794	-	0.0666667	0.2
BLS5	59.4228	6.456	31-Aug-2016	-3.69	152.79	SKS	-21.236	-12.9663	-9.10112	1.62	1.88	2.12	-2.34552	-2.16802	-1.99053	-	no	66.6658	23.1672	-	0.0666667	0.2
BORU	57.6345	12.7697	21-Sep-2013	-7.26	119.96	SKKS	NULL	NULL	NULL	NULL	NULL	NULL	0.0183102	0.130295	0.242279	-	no	53.2905	59.4176	-	0.0666667	0.2
BORU	57.6345	12.7697	21-Sep-2013	-7.26	119.96	SKS	NULL	NULL	NULL	NULL	NULL	NULL	-0.0839837	-0.0409171	0.0021495	-	no	57.6143	38.3114	-	0.0666667	0.2
BORU	57.6345	12.7697	04-Aug-2016	-22.33	-66	SKKS	NULL	NULL	NULL	NULL	NULL	NULL	0.0679078	0.169274	0.27064	-	no	41.6622	-21.5741	-	0.0666667	0.2
BORU	57.6345	12.7697	04-Aug-2016	-22.33	-66	SKS	NULL	NULL	NULL	NULL	NULL	NULL	-0.128206	0.0231256	0.174457	-	no	50.2859	-8.54143	-	0.0666667	0.2
BORU	57.6345	12.7697	31-Aug-2016	-3.69	152.79	SKKS	-21.236	-3.63966	15.1685	0.66	0.86	1.14	-0.962221	-0.887271	-0.812321	0.609856	yes	67.2063	61.6141	-	0.0666667	0.2
BORU	57.6345	12.7697	31-Aug-2016	-3.69	152.79	SKS	NULL	NULL	NULL	NULL	NULL	NULL	-0.202464	-0.143268	-0.0840708	0.609856	yes	63.9115	30.3541	-	0.0666667	0.2
BURU	64.5836	21.3769	25-Jul-2016	-26.11	-70.65	SKKS	-87.9775	-66.1218	-39.4382	0.4	0.64	1.12	0.500376	0.561964	0.623553	-	no	52.0967	-20.6625	-	0.0666667	0.26
BURU	64.5836	21.3769	25-Jul-2016	-26.11	-70.65	SKS	-81.9101	-68.1218	-57.6404	0.7	0.9	1.16	0.778071	0.831876	0.88568	-	no	60.4602	-2.09532	-	0.0666667	0.26
BURU	64.5836	21.3769	23-Aug-2016	-7.28	122.45	SKKS	NULL	NULL	NULL	NULL	NULL	NULL	0.0215642	0.0885189	0.155474	-	no	55.8761	74.9719	-	0.0666667	0.2
BURU	64.5836	21.3769	23-Aug-2016	-7.28	122.45	SKS	NULL	NULL	NULL	NULL	NULL	NULL	-0.120292	-0.0798875	-0.0394825	-	no	62.4415	54.5117	-	0.0666667	0.2
BYXU	57.2899	17.0083	31-Aug-2016	-3.69	152.79	SKKS	75.8427	86.8296	-81.9101	0.58	0.74	0.96	0.811152	0.90068	0.990208	-	no	65.1588	65.7716	-	0.0806667	0.24
BYXU	57.2899	17.0083	31-Aug-2016	-3.69	152.79	SKS	-81.9101	-73.1704	-69.7753	1.32	1.52	1.76	1.23434	1.41756	1.60077	-	no	62.9753	35.8497	-	0.0806667	0.24
DOMB	62.073	9.112	31-Aug-2016	-3.69	152.79	SKKS	NULL	NULL	NULL	NULL	NULL	NULL	0.0553419	0.180471	0.305599	-	no	71.9664	69.075	-	0.0666667	0.2
DOMB	62.073	9.112	31-Aug-2016	-3.69	152.79	SKS	NULL	NULL	NULL	NULL	NULL	NULL	-0.0546378	0.0494384	0.153515	-	no	69.2092	29.8289	-	0.0666667	0.2
DUNU	67.1215	20.5688	21-Sep-2013	-7.26	119.96	SKKS	NULL	NULL	NULL	NULL	NULL	NULL	-0.182436	-0.102413	-0.0223903	-	no	56.841	76.9623	-	0.0666667	0.2
DUNU	67.1215	20.5688	21-Sep-2013	-7.26	119.96	SKS	NULL	NULL	NULL	NULL	NULL	NULL	-0.241738	-0.184765	-0.127793	-	no	64.1527	56.9288	-	0.0666667	0.2
DUNU	67.1215	20.5688	01-May-2015	-5.2	151.8	SKKS	NULL	NULL	NULL	NULL	NULL	NULL	-0.00452262	0.0486808	0.101884	-	no	68.8219	92.9624	-	0.0666667	0.2
DUNU	67.1215	20.5688	01-May-2015	-5.2	151.8	SKS	NULL	NULL	NULL	NULL	NULL	NULL	0.0732326	0.165663	0.258093	-	no	71.8942	54.5849	-	0.0666667	0.2
DUNU	67.1215	20.5688	23-Aug-2016	-7.28	122.45	SKKS	NULL	NULL	NULL	NULL	NULL	NULL	-0.108303	-0.0216155	0.0650724	-	no	57.7336	78.0625	-	0.0666667	0.2
DUNU	67.1215	20.5688	23-Aug-2016	-7.28	122.45	SKS	NULL	NULL	NULL	NULL	NULL	NULL	-0.146282	-0.0770448	-0.00780724	-	no	64.818	56.9174	-	0.0666667	0.2
EKSU	57.5726	15.3016	25-Jul-2016	-26.11	-70.65	SKKS	NULL	NULL	NULL	NULL	NULL	NULL	0.00578062	0.0545215	0.103262	-	no	43.5959	-19.3507	-	0.0666667	0.2
EKSU	57.5726	15.3016	25-Jul-2016	-26.11	-70.65	SKS	NULL	NULL	NULL	NULL	NULL	NULL	-0.0155402	0.0601632	0.135867	-	no	51.9583	-4.43728	-	0.0666667	0.2
EKSU	57.5726	15.3016	04-Aug-2016	-22.33	-66	SKKS	NULL	NULL	NULL	NULL	NULL	NULL	0.0468504	0.136527	0.226203	-	no	42.4133	-19.6745	-	0.0666667	0.2
EKSU	57.5726	15.3016	04-Aug-2016	-22.33	-66	SKS	NULL	NULL	NULL	NULL	NULL	NULL	0.112883	0.179999	0.247116	-	no	50.8486	-5.99323	-	0.0666667	0.2
ERTU	66.5541	22.1895	01-Nov-2014	-19.7	-177.79	SKKS	75.8427	81.3947	87.9775	1.3	1.56	1.84	1.42322	1.56211	1.701	-	no	80.1726	87.2831	-	0.0666667	0.24
ERTU	66.5541	22.1895	01-Nov-2014	-19.7	-177.79	SKS	67.7528	75.3947	83.9326	1.52	1.86	2.18	0.148246	0.392568	0.636891	-	no	73.4529	34.3071	-	0.0666667	0.24
ERTU	66.5541	22.1895	20-Oct-2015	-14.84	167.31	SKKS	NULL	NULL	NULL	NULL	NULL	NULL	-0.165921	-0.0940437	-0.0221666	-	no	74.0037	90.8628	-	0.0666667	0.2
ERTU	66.5541	22.1895	20-Oct-2015	-14.84	167.31	SKS	NULL	NULL	NULL	NULL	NULL	NULL	0.110465	0.189807	0.269149	-	no	72.5904	43.7305	-	0.0666667	0.2
FALU	60.4943	15.8318	20-Oct-2015	-14.84	167.31	SKKS	-27.3034	-1.02315	17.191	0.58	0.92	1.38	-0.955146	-0.872618	-0.790091	0.520118	yes	72.5541	63.334	-	0.0666667	0.24
FALU	60.4943	15.8318	20-Oct-2015	-14.84	167.31	SKS	NULL	NULL	NULL	NULL	NULL	NULL	-0.269972	-0.154071	-0.0381693	0.520118	yes	66.6496	28.5227	-	0.0666667	0.24
FALU	60.4943	15.8318	25-Jul-2016	-26.11	-70.65	SKKS	NULL	NULL	NULL	NULL	NULL	NULL	-0.232643	-0.167874	-0.103106	-	no	46.5745	-20.9387	-	0.0666667	0.2
FALU	60.4943	15.8318	25-Jul-2016	-26.11	-70.65	SKS	NULL	NULL	NULL	NULL	NULL	NULL	-0.154723	-0.0069975	0.140728	-	no	55.1213	-5.17808	-	0.0666667	0.2
FIA1	61.4447	26.0761	21-Jul-2014	-19.78	-178.44	SKKS	59.6629	73.4855	-92.0225	0.7	0.9	1.2	0.925504	0.987001	1.0485	-	no	74.208	71.0945	-	0.0666667	0.2
FIA1	61.4447	26.0761	21-Jul-2014	-19.78	-178.44	SKS	61.6854	71.4855	83.9326	1	1.3	1.6	1.39155	1.47098	1.55041	-	no	67.2472	36.6034	-	0.0666667	0.2
FIA1	61.4447	26.0761	09-May-2017	-14.6	167.38	SKKS	-21.236	2.09638	27.3034	0.3	0.4	0.6	-0.456857	-0.409705	-0.362552	0.104282	yes	69.0286	78.3927	-	0.0666667	0.26
FIA1	61.4447	26.0761	09-May-2017	-14.6	167.38	SKS	NULL	NULL	NULL	NULL	NULL	NULL	-0.258269	-0.174233	-0.0901965	0.104282	yes	66.609	43.3388	-	0.0666667	0.26
FIA1	61.4447	26.0761	20-Oct-2015	-14.84	167.31	SKKS	15.1685	24.2828	33.3708	0.7	1	1.3	-0.70937	-0.616975	-0.52458	0.568192	yes	68.9599	78.3255	-	0.0666667	0.3
FIA1	61.4447	26.0761	20-Oct-2015	-14.84	167.31	SKS	NULL	NULL	NULL	NULL	NULL	NULL	0.0436125	0.100034	0.156457	0.568192	yes	66.5711	43.313	-	0.0666667	0.3
FIA1	61.4447	26.0761	31-Aug-2016	-3.69	152.79	SKKS	NULL	NULL	NULL	NULL	NULL	NULL	-0.281342	-0.192137	-0.102932	-	no	64.3394	83.1508	-	0.0666667	0.22
FIA1	61.4447	26.0761	31-Aug-2016	-3.69	152.79	SKS	NULL	NULL	NULL	NULL	NULL	NULL	-0.264887	-0.191589	-0.118292	-	no	65.7437	52.447	-	0.0666667	0.22
FIA1	61.4447	26.0761	21-Sep-2013	-7.26	119.96	SKKS	47.5281	64.0804	75.8427	0.6	1	1.5	-0.781047	-0.684739	-0.588432	-	no	51.0491	73.6687	-	0.0666667	0.26
FIA1	61.4447	26.0761	21-Sep-2013	-7.26	119.96	SKS	27.3034	40.0804	55.618	0.7	0.9	1.2	-1.22619	-1.10015	-0.974111	-	no	57.6872	56.6206	-	0.0666667	0.26
FIA1	61.4447	26.0761	02-Sep-2011	-28.4	-63.07	SKKS	15.1685	32.8062	49.5506	0.7	1	1.3	-0.790298	-0.703797	-0.617295	0.380197	yes	48.4532	-10.8199	-	0.0666667	0.2
FIA1	61.4447	26.0761	02-Sep-2011	-28.4	-63.07	SKS	NULL	NULL	NULL	NULL	NULL	NULL	-0.237098	-0.179923	-0.122748	0.380197	yes	56.795	5.85316	-	0.0666667	0.2
FIA1	61.4447	26.0761	04-Aug-2016	-22.33	-66	SKKS	31.3483	50.6515	65.7303	0.7	1.2	1.9	-1.02306	-0.85234	-0.681621	0.798189	yes	49.488	-14.5519	-	0.0666667	0.22
FIA1	61.4447	26.0761	04-Aug-2016	-22.33	-66	SKS	NULL	NULL	NULL	NULL	NULL	NULL	0.116568	0.18099	0.245411	0.798189	yes	57.2823	3.05996	-	0.0666667	0.22
FIA1	61.4447	26.0761	25-Jul-2016	-26.11	-70.65	SKKS	27.3034	52.4629	67.7528	0.4	0.7	1.1	-0.617715	-0.55178	-0.485845	0.537809	yes	50.7407	-14.1775	-	0.0666667	0.3
FIA1	61.4447	26.0761	25-Jul-2016	-26.11	-70.65	SKS	NULL	NULL	NULL	NULL	NULL	NULL	0.0519639	0.0940859	0.136208	0.537809	yes	58.1798	4.78176	-	0.0666667	0.3
FIA1	61.4447	26.0761	20-Jun-2011	-21.7	-68.23	SKKS	55.618	62.8963	69.7753	0.9	1.3	1.7	-0.767739	-0.590382	-0.413025	0.184656	yes	50.241	-15.4846	-	0.0886667	0.28
FIA1	61.4447	26.0761	20-Jun-2011	-21.7	-68.23	SKS	NULL	NULL	NULL	NULL	NULL	NULL	-0.22837	-0.126626	-0.0248814	0.184656	yes	57.7426	2.76991	-	0.0886667	0.28
FIA1	61.4447	26.0761	02-Aug-2012	-8.41	-74.26	SKKS	NULL	NULL	NULL	NULL	NULL	NULL	-0.271419	-0.185918	-0.100418	-	no	53.2341	-23.2244	-	0.0666667	0.2
FIA1	61.4447	26.0761	02-Aug-2012	-8.41	-74.26	SKS	NULL	NULL	NULL	NULL	NULL	NULL	-0.151136	-0.0466685	0.0577988	-	no	59.3486	-3.64502	-	0.0666667	0.2
FIBU	59.9013	17.3518	04-Aug-2016	-22.33	-66	SKKS	NULL	NULL	NULL	NULL	NULL	NULL	-0.121109	-0.0426398	0.0358293	-	no	45.2387	-19.6312	-	0.0666667	0.2
FIBU	59.9013	17.3518	04-Aug-2016	-22.33	-66	SKS	NULL	NULL	NULL	NULL	NULL	NULL	-0.3003	-0.152773	-0.00524511	-	no	53.7415	-4.92633	-	0.0666667	0.2
FINU	59.4034	12.4789	31-Aug-2016	-3.69	152.79	SKKS	-21.236	-8.59067	3.03371	0.92	1.14	1.42	-1.13873	-1.00606	-0.873377	0.926525	yes	68.7002	65.3687	-	0.0666667	0.2
FINU	59.4034	12.4789	31-Aug-2016	-3.69	152.79	SKS	NULL	NULL	NULL	NULL	NULL	NULL	0.053148	0.122387	0.191625	0.926525	yes	65.88	31.6525	-	0.0666667	0.2
FKPU	58.1591	13.7241	25-Jul-2016	-26.11	-70.65	SKKS	NULL	NULL	NULL	NULL	NULL	NULL	0.00870064	0.0427054	0.0767103	-	no	43.6733	-20.9159	-	0.0666667	0.2
FKPU	58.1591	13.7241	25-Jul-2016	-26.11	-70.65	SKS	NULL	NULL	NULL	NULL	NULL	NULL	0.0406147	0.122852	0.205088	-	no	52.2303	-6.26914	-	0.0666667	0.2
FLYU	60.1282	17.8846	24-Sep-2014	-23.85	-66.55	SKKS	NULL	NULL	NULL	NULL	NULL	NULL	-0.0225917	0.0757381	0.174068	-	no	45.7056	-18.97	-	0.0666667	0.2
FLYU	60.1282	17.8846	24-Sep-2014	-23.85	-66.55	SKS	NULL	NULL	NULL	NULL	NULL	NULL	-0.0324305	0.0650781	0.162587	-	no	54.2631	-3.8592	-	0.0666667	0.2
FLYU	60.1282	17.8846	25-Jul-2016	-26.11	-70.65	SKKS	-92.0225	-78.9154	-53.5955	0.46	0.76	1.28	0.566534	0.644244	0.721954	-	no	46.8924	-19.1254	-	0.0666667	0.2
FLYU	60.1282	17.8846	25-Jul-2016	-26.11	-70.65	SKS	-85.9551	-56.9154	-37.4157	0.52	0.78	1.14	1.1449	1.26758	1.39027	-	no	55.1859	-2.89445	-	0.0666667	0.2
FORU	60.387	18.1801	28-Sep-2015	-23.78	-66.58	SKKS	NULL	NULL	NULL	NULL	NULL	NULL	-0.202277	-0.115025	-0.0277736	-	no	46.0621	-18.9659	-	0.0666667	0.2
FORU	60.387	18.1801	28-Sep-2015	-23.78	-66.58	SKS	NULL	NULL	NULL	NULL	NULL	NULL	-0.164023	-0.0145911	0.134841	-	no	54.6046	-3.71163	-	0.0666667	0.2
FORU	60.387	18.1801	04-Aug-2016	-22.33	-66	SKKS	NULL	NULL	NULL	NULL	NULL	NULL	-0.243446	-0.176332	-0.109218	-	no	45.9556	-19.3713	-	0.0666667	0.2
FORU	60.387	18.1801	04-Aug-2016	-22.33	-66	SKS	NULL	NULL	NULL	NULL	NULL	NULL	-0.179164	-0.0923951	-0.00562591	-	no	54.4374	-4.32573	-	0.0666667	0.2
GNOU	57.29	13.756	30-Apr-2015	-5.39	151.82	SKKS	NULL	NULL	NULL	NULL	NULL	NULL	-0.35853	-0.178886	0.00075662	-	no	65.7936	62.0664	-	0.0666667	0.2
GNOU	57.29	13.756	30-Apr-2015	-5.39	151.82	SKS	NULL	NULL	NULL	NULL	NULL	NULL	0.000891675	0.0856979	0.170504	-	no	63.0782	31.5592	-	0.0666667	0.2
GNOU	57.29	13.756	25-Jul-2016	-26.11	-70.65	SKKS	NULL	NULL	NULL	NULL	NULL	NULL	0.00284912	0.0391452	0.0754412	-	no	42.8399	-20.3621	-	0.0666667	0.2
GNOU	57.29	13.756	25-Jul-2016	-26.11	-70.65	SKS	NULL	NULL	NULL	NULL	NULL	NULL	-0.200391	-0.115755	-0.031118	-	no	51.3318	-5.88775	-	0.0666667	0.2
GNOU	57.29	13.756	04-Aug-2016	-22.33	-66	SKKS	NULL	NULL	NULL	NULL	NULL	NULL	-0.171684	-0.0850112	0.00166121	-	no	41.6581	-20.6559	-	0.0666667	0.2
GNOU	57.29	13.756	04-Aug-2016	-22.33	-66	SKS	NULL	NULL	NULL	NULL	NULL	NULL	-0.227763	-0.0974	0.032963	-	no	50.177	-7.43111	-	0.0666667	0.2
GOTU	57.6855	18.57	20-Oct-2015	-14.84	167.31	SKKS	NULL	NULL	NULL	NULL	NULL	NULL	-0.146523	-0.0967983	-0.0470734	-	no	68.7864	60.6266	-	0.0666667	0.2
GOTU	57.6855	18.57	20-Oct-2015	-14.84	167.31	SKS	NULL	NULL	NULL	NULL	NULL	NULL	-0.150776	-0.0581767	0.0344224	-	no	63.2241	30.5706	-	0.0666667	0.2
GOTU	57.6855	18.57	25-Jul-2016	-26.11	-70.65	SKKS	-90	-57.2978	-33.3708	0.44	0.76	1.26	1.15318	1.29527	1.43735	-	no	44.7678	-16.845	-	0.0666667	0.24
GOTU	57.6855	18.57	25-Jul-2016	-26.11	-70.65	SKS	-77.8652	-63.2978	-53.5955	0.76	0.94	1.12	0.972101	1.06019	1.14828	-	no	52.7745	-1.11347	-	0.0666667	0.24
GOTU	57.6855	18.57	31-Aug-2016	-3.69	152.79	SKKS	73.8202	76.2487	85.9551	0.9	1.12	1.32	0.905009	0.988818	1.07263	-	no	64.8242	68.2333	-	0.0666667	0.26
GOTU	57.6855	18.57	31-Aug-2016	-3.69	152.79	SKS	-85.9551	-75.7513	-71.7978	1.06	1.26	1.46	1.31192	1.436	1.56008	-	no	63.1778	38.3427	-	0.0666667	0.26
GRAU	60.3342	18.5396	04-Aug-2016	-22.33	-66	SKKS	NULL	NULL	NULL	NULL	NULL	NULL	-0.222352	-0.0432804	0.135791	-	no	46.0238	-19.076	-	0.0666667	0.2
GRAU	60.3342	18.5396	04-Aug-2016	-22.33	-66	SKS	NULL	NULL	NULL	NULL	NULL	NULL	0.0189318	0.152949	0.286966	-	no	54.4685	-3.93846	-	0.0666667	0.2
HAMF	70.6425	23.6842	12-Jul-2010	-22.15	-68.2	SKKS	NULL	NULL	NULL	NULL	NULL	NULL	-0.169654	-0.0890726	-0.0084911	-	no	57.0274	-27.4597	-	0.0666667	0.2
HAMF	70.6425	23.6842	12-Jul-2010	-22.15	-68.2	SKS	NULL	NULL	NULL	NULL	NULL	NULL	-0.0819015	-0.0200737	0.0417541	-	no	66.2104	-7.64073	-	0.0666667	0.2
HAMF	70.6425	23.6842	03-Sep-2011	-56.45	-26.85	SKKS	NULL	NULL	NULL	NULL	NULL	NULL	-0.166449	-0.0609342	0.0445809	-	no	51.3856	4.22118	-	0.0666667	0.2
HAMF	70.6425	23.6842	03-Sep-2011	-56.45	-26.85	SKS	NULL	NULL	NULL	NULL	NULL	NULL	-0.20061	-0.0594657	0.0816784	-	no	63.7384	13.3181	-	0.0666667	0.2
HAMF	70.6425	23.6842	22-Nov-2011	-15.36	-65.09	SKKS	NULL	NULL	NULL	NULL	NULL	NULL	0.0652155	0.19261	0.320005	-	no	55.9352	-28.5251	-	0.0666667	0.2
HAMF	70.6425	23.6842	22-Nov-2011	-15.36	-65.09	SKS	NULL	NULL	NULL	NULL	NULL	NULL	0.00188308	0.0907838	0.179684	-	no	65.0847	-10.9024	-	0.0666667	0.2
HAMF	70.6425	23.6842	07-May-2015	-7.23	154.55	SKKS	-3.03371	14.7408	29.3258	0.82	1.14	1.5	-1.52492	-1.10829	-0.691668	-	no	69.5706	105.316	-	0.0666667	0.26
HAMF	70.6425	23.6842	07-May-2015	-7.23	154.55	SKS	15.1685	24.7408	33.3708	1.12	1.52	1.9	-1.20247	-1.10817	-1.01386	-	no	74.688	65.2119	-	0.0666667	0.26
HAMF	70.6425	23.6842	25-Jul-2016	-26.11	-70.65	SKKS	NULL	NULL	NULL	NULL	NULL	NULL	-0.123798	-0.0117305	0.100337	-	no	57.8978	-26.9057	-	0.0666667	0.18
HAMF	70.6425	23.6842	25-Jul-2016	-26.11	-70.65	SKS	NULL	NULL	NULL	NULL	NULL	NULL	-0.288942	-0.192861	-0.0967809	-	no	66.9151	-5.65457	-	0.0666667	0.18
HAMF	70.6425	23.6842	31-Aug-2016	-3.69	152.79	SKKS	-13.1461	3.52274	21.236	0.92	1.32	1.8	-1.38274	-1.28895	-1.19516	-	no	68.9847	105.73	-	0.0666667	0.2
HAMF	70.6425	23.6842	31-Aug-2016	-3.69	152.79	SKS	9.10112	17.5227	25.2809	1.12	1.32	1.54	-1.45205	-1.37721	-1.30237	-	no	74.4486	68.2212	-	0.0666667	0.2
HAMF	70.6425	23.6842	09-May-2017	-14.6	167.38	SKKS	NULL	NULL	NULL	NULL	NULL	NULL	-0.201081	-0.117513	-0.033946	-	no	74.6712	109.16	-	0.0666667	0.2
HAMF	70.6425	23.6842	09-May-2017	-14.6	167.38	SKS	NULL	NULL	NULL	NULL	NULL	NULL	-0.179583	-0.0935973	-0.0076118	-	no	76.5865	54.0926	-	0.0666667	0.2
HAMF	70.6425	23.6842	19-Aug-2017	-17.97	-178.85	SKKS	NULL	NULL	NULL	NULL	NULL	NULL	0.0930481	0.178563	0.264078	-	no	80.2733	117.096	-	0.0666667	0.2
HAMF	70.6425	23.6842	19-Aug-2017	-17.97	-178.85	SKS	NULL	NULL	NULL	NULL	NULL	NULL	-0.122212	-0.0676596	-0.0131075	-	no	77.9993	43.3512	-	0.0666667	0.2
HARU	66.1635	20.9752	25-Jul-2016	-26.11	-70.65	SKKS	NULL	NULL	NULL	NULL	NULL	NULL	0.10055	0.169786	0.239021	-	no	53.372	-22.6285	10	0.0666667	0.2
HARU	66.1635	20.9752	25-Jul-2016	-26.11	-70.65	SKS	NULL	NULL	NULL	NULL	NULL	NULL	0.0606886	0.124243	0.187798	-	no	61.9761	-3.70048	10	0.0666667	0.2
HARU	66.1635	20.9752	04-Aug-2016	-22.33	-66	SKKS	NULL	NULL	NULL	NULL	NULL	NULL	-0.220544	-0.0332657	0.154013	-	no	51.976	-22.4515	10	0.0666667	0.2
HARU	66.1635	20.9752	04-Aug-2016	-22.33	-66	SKS	NULL	NULL	NULL	NULL	NULL	NULL	-0.200648	-0.0310365	0.138575	-	no	60.8855	-5.25869	10	0.0666667	0.2
HASU	62.1532	16.6136	25-Jul-2016	-26.11	-70.65	SKKS	NULL	NULL	NULL	NULL	NULL	NULL	0.00131188	0.0146168	0.0279218	-	no	48.4081	-21.6403	-	0.0666667	0.2
HASU	62.1532	16.6136	25-Jul-2016	-26.11	-70.65	SKS	NULL	NULL	NULL	NULL	NULL	NULL	0.094976	0.143564	0.192152	-	no	57.0015	-5.26817	-	0.0666667	0.2
HASU	62.1532	16.6136	04-Aug-2016	-22.33	-66	SKKS	NULL	NULL	NULL	NULL	NULL	NULL	0.0789662	0.129864	0.180762	-	no	47.0709	-21.7439	-	0.0666667	0.16
HASU	62.1532	16.6136	04-Aug-2016	-22.33	-66	SKS	NULL	NULL	NULL	NULL	NULL	NULL	0.122143	0.163661	0.205179	-	no	55.8746	-6.77403	-	0.0666667	0.16
HEF	68.3916	23.6572	04-Mar-2010	-22.23	-68.33	SKKS	NULL	NULL	NULL	NULL	NULL	NULL	-0.0341385	0.0751898	0.184518	-	no	55.3317	-24.4688	-	0.0666667	0.2
HEF	68.3916	23.6572	04-Mar-2010	-22.23	-68.33	SKS	NULL	NULL	NULL	NULL	NULL	NULL	-0.0433046	0.0202001	0.0837048	-	no	64.0991	-5.07386	-	0.0666667	0.2
HEF	68.3916	23.6572	20-Oct-2015	-14.84	167.31	SKKS	-27.3034	-5.69644	13.1461	0.4	0.5	0.7	-0.522271	-0.473739	-0.425206	0.308429	yes	74.1606	99.0319	-	0.0666667	0.24
HEF	68.3916	23.6572	20-Oct-2015	-14.84	167.31	SKS	NULL	NULL	NULL	NULL	NULL	NULL	-0.116777	-0.0572081	0.00236067	0.308429	yes	74.2945	48.9094	-	0.0666667	0.24
HEF	68.3916	23.6572	25-Jul-2016	-26.11	-70.65	SKKS	NULL	NULL	NULL	NULL	NULL	NULL	0.112833	0.176676	0.240519	-	no	56.091	-23.7257	-	0.0666667	0.2
HEF	68.3916	23.6572	25-Jul-2016	-26.11	-70.65	SKS	NULL	NULL	NULL	NULL	NULL	NULL	0.103679	0.130876	0.158074	-	no	64.7116	-3.18134	-	0.0666667	0.2
HFC2	60.1335	13.6945	23-Jul-2007	-4.47	149.85	SKKS	NULL	NULL	NULL	NULL	NULL	NULL	-0.232926	-0.0936788	0.0455688	-	no	67.3585	67.9241	-	0.0666667	0.2
HFC2	60.1335	13.6945	23-Jul-2007	-4.47	149.85	SKS	NULL	NULL	NULL	NULL	NULL	NULL	-0.108289	0.0118793	0.132048	-	no	65.9151	34.8169	-	0.0666667	0.2
HFC2	60.1335	13.6945	24-Oct-2009	-6.13	130.38	SKKS	NULL	NULL	NULL	NULL	NULL	NULL	-0.298302	-0.196695	-0.0950889	-	no	58.9465	66.0939	-	0.0666667	0.2
HFC2	60.1335	13.6945	24-Oct-2009	-6.13	130.38	SKS	NULL	NULL	NULL	NULL	NULL	NULL	-0.231125	-0.157919	-0.0847143	-	no	62.1785	40.4223	-	0.0666667	0.2
HFC2	60.1335	13.6945	31-Aug-2016	-3.69	152.79	SKKS	-21.236	0.411519	23.2584	0.6	0.88	1.2	-0.653951	-0.592886	-0.531821	0.558497	yes	68.7122	68.3709	-	0.0666667	0.22
HFC2	60.1335	13.6945	31-Aug-2016	-3.69	152.79	SKS	NULL	NULL	NULL	NULL	NULL	NULL	0.0266758	0.0847871	0.142898	0.558497	yes	66.4848	34.0792	-	0.0666667	0.22
HUSU	63.3416	19.2184	01-Nov-2014	-19.7	-177.79	SKKS	NULL	NULL	NULL	NULL	NULL	NULL	0.140103	0.193367	0.246632	-	no	79.0808	65.1225	-	0.0666667	0.2
HUSU	63.3416	19.2184	01-Nov-2014	-19.7	-177.79	SKS	NULL	NULL	NULL	NULL	NULL	NULL	0.00639544	0.0673582	0.128321	-	no	69.9874	27.6491	-	0.0666667	0.2
JOF	62.9182	31.3124	12-Jul-2007	-7.93	-74.38	SKKS	NULL	NULL	NULL	NULL	NULL	NULL	-0.262336	-0.158445	-0.0545535	-	no	56.3427	-21.6163	-	0.0666667	0.2
JOF	62.9182	31.3124	12-Jul-2007	-7.93	-74.38	SKS	NULL	NULL	NULL	NULL	NULL	NULL	-0.0161409	0.0311044	0.0783496	-	no	62.0725	0.456601	-	0.0666667	0.2
JOF	62.9182	31.3124	08-Jul-2008	-15.99	-71.75	SKKS	NULL	NULL	NULL	NULL	NULL	NULL	-0.0129057	0.0216095	0.0561247	-	no	54.8564	-16.9701	-	0.0666667	0.16
JOF	62.9182	31.3124	08-Jul-2008	-15.99	-71.75	SKS	NULL	NULL	NULL	NULL	NULL	NULL	-0.13633	-0.082734	-0.0291385	-	no	61.2185	4.73043	-	0.0666667	0.16
JOF	62.9182	31.3124	30-Aug-2008	-6.15	147.26	SKKS	11.1236	23.2586	35.3933	0.9	1.1	1.4	-1.46379	-1.3277	-1.19162	-	no	60.4741	88.1742	-	0.0666667	0.2
JOF	62.9182	31.3124	30-Aug-2008	-6.15	147.26	SKS	7.07865	13.2586	21.236	1.3	1.6	1.8	-1.52155	-1.36595	-1.21036	-	no	64.6288	61.5035	-	0.0666667	0.2
JOF	62.9182	31.3124	12-Jul-2009	-15.04	-70.44	SKKS	NULL	NULL	NULL	NULL	NULL	NULL	0.0568374	0.171257	0.285676	-	no	54.4561	-16.9953	-	0.0666667	0.2
JOF	62.9182	31.3124	12-Jul-2009	-15.04	-70.44	SKS	NULL	NULL	NULL	NULL	NULL	NULL	-0.080398	-0.0338786	0.0126408	-	no	60.9475	4.12645	-	0.0666667	0.2
JOF	62.9182	31.3124	20-Mar-2010	-3.36	152.24	SKKS	13.1461	29.33	43.4831	1.1	1.6	2.2	-1.71407	-1.56527	-1.41647	-	no	62.8181	90.6044	-	0.022	0.17
JOF	62.9182	31.3124	20-Mar-2010	-3.36	152.24	SKS	5.05618	17.33	31.3483	1.1	1.3	1.6	-1.01703	-0.926999	-0.836971	-	no	65.9919	61.6298	-	0.022	0.17
JOF	62.9182	31.3124	22-Nov-2011	-15.36	-65.09	SKKS	NULL	NULL	NULL	NULL	NULL	NULL	-0.226461	-0.184	-0.141539	-	no	52.6654	-14.9454	-	0.0326667	0.2
JOF	62.9182	31.3124	22-Nov-2011	-15.36	-65.09	SKS	NULL	NULL	NULL	NULL	NULL	NULL	-0.108258	-0.0680504	-0.027843	-	no	59.768	4.26876	-	0.0326667	0.2
JOF	62.9182	31.3124	06-Jul-2012	-14.66	167.34	SKKS	17.191	23.0806	27.3034	1.6	1.9	2.2	-0.900512	-0.757478	-0.614444	-	no	67.9171	87.0663	-	0.0666667	0.26
JOF	62.9182	31.3124	06-Jul-2012	-14.66	167.34	SKS	-13.1461	11.0806	31.3483	0.5	0.7	1	-0.779197	-0.689626	-0.600055	-	no	67.4562	51.7575	-	0.0666667	0.26
JOF	62.9182	31.3124	20-Oct-2015	-14.84	167.31	SKKS	7.07865	15.1934	23.2584	1.2	1.5	1.8	-0.982802	-0.84578	-0.708757	-	no	67.8772	87.0111	-	0.0666667	0.24
JOF	62.9182	31.3124	20-Oct-2015	-14.84	167.31	SKS	9.10112	15.1934	23.2584	0.9	1	1.2	-1.08056	-1.00153	-0.9225	-	no	67.4352	51.7488	-	0.0666667	0.24
JOF	62.9182	31.3124	31-Aug-2016	-3.69	152.79	SKKS	11.1236	16.9463	25.2809	1.32	1.54	1.74	-1.65219	-1.5419	-1.43161	-	no	63.0438	90.4422	-	0.0666667	0.2
JOF	62.9182	31.3124	31-Aug-2016	-3.69	152.79	SKS	7.07865	14.9463	21.236	1.26	1.46	1.66	-1.93584	-1.84053	-1.74521	-	no	66.0808	61.1929	-	0.0666667	0.2
JOF	62.9182	31.3124	15-Apr-2017	-23.24	-67.65	SKKS	NULL	NULL	NULL	NULL	NULL	NULL	-0.147196	-0.0711847	0.0048267	-	no	53.0042	-12.3639	-	0.0666667	0.2
JOF	62.9182	31.3124	15-Apr-2017	-23.24	-67.65	SKS	NULL	NULL	NULL	NULL	NULL	NULL	-0.192351	-0.121425	-0.0504989	-	no	60.1797	7.91046	-	0.0666667	0.2
JOF	62.9182	31.3124	09-May-2017	-14.6	167.38	SKKS	3.03371	11.0111	19.2135	1.04	1.26	1.48	-1.55003	-1.44864	-1.34725	-	no	67.9426	87.091	-	0.0666667	0.2
JOF	62.9182	31.3124	09-May-2017	-14.6	167.38	SKS	-11.1236	3.0111	19.2135	0.68	0.9	1.18	-1.12196	-1.05462	-0.987276	-	no	67.4683	51.7567	-	0.0666667	0.2
JOF	62.9182	31.3124	17-Jun-2017	-24.1	179.59	SKKS	-21.236	1.52002	21.236	0.48	0.74	1.04	-0.930467	-0.825951	-0.721434	-	no	71.7299	81.0136	-	0.0666667	0.26
JOF	62.9182	31.3124	17-Jun-2017	-24.1	179.59	SKS	-27.3034	-12.48	1.01124	0.66	0.96	1.3	-0.351467	-0.231869	-0.112271	-	no	67.6474	44.5021	-	0.0666667	0.26
JOF	62.9182	31.3124	13-Jul-2017	-4.79	153.16	SKKS	-1.01124	7.06218	15.1685	1.7	2.1	2.5	-2.05448	-1.73043	-1.40637	-	no	62.9725	90.5061	-	0.0666667	0.22
JOF	62.9182	31.3124	13-Jul-2017	-4.79	153.16	SKS	15.1685	23.0622	29.3258	1.26	1.52	1.78	-2.20796	-2.03085	-1.85374	-	no	66.0546	60.9617	-	0.0666667	0.22
KAF	62.1112	26.3095	12-Jul-2007	-7.93	-74.38	SKKS	NULL	NULL	NULL	NULL	NULL	NULL	-0.0877696	-0.0335798	0.0206101	-	no	53.8764	-24.0861	-	0.0666667	0.2
KAF	62.1112	26.3095	12-Jul-2007	-7.93	-74.38	SKS	NULL	NULL	NULL	NULL	NULL	NULL	0.122815	0.18702	0.251224	-	no	60.0538	-4.29182	-	0.0666667	0.2
KAF	62.1112	26.3095	21-Jul-2007	-22.15	-65.78	SKKS	NULL	NULL	NULL	NULL	NULL	NULL	-0.207702	-0.158442	-0.109182	-	no	50.1264	-14.9564	-	0.0666667	0.2
KAF	62.1112	26.3095	21-Jul-2007	-22.15	-65.78	SKS	NULL	NULL	NULL	NULL	NULL	NULL	0.0525611	0.19477	0.336979	-	no	57.9633	2.81745	-	0.0666667	0.2
KAF	62.1112	26.3095	24-Oct-2009	-6.13	130.38	SKKS	23.2584	34.3636	47.5281	0.9	1.2	1.5	-1.41935	-1.32232	-1.22528	-	no	55.2865	78.5723	-	0.0666667	0.22
KAF	62.1112	26.3095	24-Oct-2009	-6.13	130.38	SKS	17.191	24.3636	31.3483	0.9	1	1.1	-0.993552	-0.95296	-0.912369	-	no	60.9849	57.6223	-	0.0666667	0.22
KAF	62.1112	26.3095	24-May-2010	-8.08	-71.56	SKKS	NULL	NULL	NULL	NULL	NULL	NULL	-0.148662	-0.089001	-0.0293397	-	no	52.9876	-22.7826	-	0.0666667	0.2
KAF	62.1112	26.3095	24-May-2010	-8.08	-71.56	SKS	NULL	NULL	NULL	NULL	NULL	NULL	-0.14424	-0.0805798	-0.01692	-	no	59.4162	-3.91664	-	0.0666667	0.2
KAF	62.1112	26.3095	04-Aug-2016	-22.33	-66	SKKS	NULL	NULL	NULL	NULL	NULL	NULL	-0.200554	-0.136715	-0.0728761	-	no	50.1878	-14.9458	-	0.0666667	0.14
KAF	62.1112	26.3095	04-Aug-2016	-22.33	-66	SKS	NULL	NULL	NULL	NULL	NULL	NULL	0.0404103	0.0972232	0.154036	-	no	58.0062	2.88546	-	0.0666667	0.14
KAF	62.1112	26.3095	31-Aug-2016	-3.69	152.79	SKKS	-9.10112	2.362	17.191	0.9	1.2	1.6	-1.26228	-1.17138	-1.08048	-	no	64.6393	84.8404	-	0.0666667	0.22
KAF	62.1112	26.3095	31-Aug-2016	-3.69	152.79	SKS	-17.191	-5.638	17.191	0.6	0.9	1.3	-0.727242	-0.673659	-0.620075	-	no	66.3439	53.5478	-	0.0666667	0.22
KEF	62.1664	24.8706	21-Jul-2007	-22.15	-65.78	SKKS	25.2809	41.791	57.6404	0.6	0.8	1.1	-0.807894	-0.73738	-0.666866	0.779936	yes	49.6925	-16.039	-	0.0626667	0.22
KEF	62.1664	24.8706	21-Jul-2007	-22.15	-65.78	SKS	NULL	NULL	NULL	NULL	NULL	NULL	0.11307	0.185259	0.257448	0.779936	yes	57.7173	1.35858	-	0.0626667	0.22
KEF	62.1664	24.8706	08-Jul-2008	-15.99	-71.75	SKKS	NULL	NULL	NULL	NULL	NULL	NULL	-0.246484	-0.187067	-0.127651	-	no	51.9361	-20.6924	-	0.0666667	0.18
KEF	62.1664	24.8706	08-Jul-2008	-15.99	-71.75	SKS	NULL	NULL	NULL	NULL	NULL	NULL	-0.21771	-0.160288	-0.102866	-	no	59.0065	-1.60706	-	0.0666667	0.18
KEF	62.1664	24.8706	24-May-2010	-8.08	-71.56	SKKS	NULL	NULL	NULL	NULL	NULL	NULL	-0.0971284	0.00715144	0.111431	-	no	52.4824	-23.8575	-	0.0666667	0.2
KEF	62.1664	24.8706	24-May-2010	-8.08	-71.56	SKS	NULL	NULL	NULL	NULL	NULL	NULL	-0.0862519	-0.001519	0.0832139	-	no	59.0715	-5.54966	-	0.0666667	0.2
KEF	62.1664	24.8706	01-May-2014	-21.5	170.35	SKKS	83.9326	-75.8694	-63.7079	0.6	1	1.4	0.805811	0.918052	1.03029	-	no	70.3075	75.0098	-	0.0666667	0.2
KEF	62.1664	24.8706	01-May-2014	-21.5	170.35	SKS	69.7753	76.1306	-92.0225	0.9	1.2	1.5	1.07135	1.17932	1.2873	-	no	66.9153	39.2628	-	0.0666667	0.2
KEF	62.1664	24.8706	21-Jul-2014	-19.78	-178.44	SKKS	59.6629	75.5561	-92.0225	0.6	0.8	1	0.757338	0.794873	0.832409	-	no	75.3725	71.293	-	0.0666667	0.2
KEF	62.1664	24.8706	21-Jul-2014	-19.78	-178.44	SKS	61.6854	77.5561	-90	0.8	1.1	1.3	1.0695	1.13467	1.19984	-	no	68.1631	35.3306	-	0.0666667	0.2
KEF	62.1664	24.8706	24-Aug-2014	-14.59	-73.58	SKKS	NULL	NULL	NULL	NULL	NULL	NULL	-0.155451	-0.116848	-0.078244	-	no	52.6579	-21.8926	-	0.0666667	0.2
KEF	62.1664	24.8706	24-Aug-2014	-14.59	-73.58	SKS	NULL	NULL	NULL	NULL	NULL	NULL	-0.118837	-0.0818429	-0.0448492	-	no	59.4469	-2.24816	-	0.0666667	0.2
KEF	62.1664	24.8706	01-Nov-2014	-19.7	-177.79	SKKS	63.7079	74.6954	85.9551	0.6	0.7	0.9	0.709523	0.752827	0.796131	-	no	75.6788	71.2093	-	0.0666667	0.26
KEF	62.1664	24.8706	01-Nov-2014	-19.7	-177.79	SKS	69.7753	76.6954	85.9551	1.2	1.4	1.6	1.35191	1.45097	1.55003	-	no	68.2563	35.1512	-	0.0666667	0.26
KEF	62.1664	24.8706	04-Aug-2016	-22.33	-66	SKKS	37.4157	47.884	57.6404	0.9	1.1	1.4	-1.0029	-0.947027	-0.891156	0.896127	yes	49.7421	-16.0494	-	0.0666667	0.2
KEF	62.1664	24.8706	04-Aug-2016	-22.33	-66	SKS	NULL	NULL	NULL	NULL	NULL	NULL	0.00497147	0.0693098	0.133648	0.896127	yes	57.7625	1.42783	-	0.0666667	0.2
KEF	62.1664	24.8706	31-Aug-2016	-3.69	152.79	SKKS	-19.2135	-1.05672	27.3034	0.6	1.1	1.8	-0.976835	-0.876211	-0.775587	0.522359	yes	65.2883	83.6873	-	0.0746667	0.24
KEF	62.1664	24.8706	31-Aug-2016	-3.69	152.79	SKS	NULL	NULL	NULL	NULL	NULL	NULL	-0.253229	-0.135832	-0.0184354	0.522359	yes	66.6804	51.7981	-	0.0746667	0.24
KEF	62.1664	24.8706	09-May-2017	-14.6	167.38	SKKS	NULL	NULL	NULL	NULL	NULL	NULL	-0.207206	-0.142996	-0.0787869	-	no	70.1095	78.9851	-	0.0666667	0.26
KEF	62.1664	24.8706	09-May-2017	-14.6	167.38	SKS	NULL	NULL	NULL	NULL	NULL	NULL	-0.256353	-0.116476	0.0234013	-	no	67.5462	42.3554	-	0.0666667	0.26
KEF	62.1664	24.8706	13-Jul-2017	-4.79	153.16	SKKS	15.1685	21.0422	27.3034	1.2	1.4	1.6	-1.40231	-1.19523	-0.988158	-	no	65.2324	83.7557	-	0.0666667	0.3
KEF	62.1664	24.8706	13-Jul-2017	-4.79	153.16	SKS	-19.2135	-2.95782	21.236	0.5	0.8	1.2	-0.832357	-0.730755	-0.629154	-	no	66.6457	51.5777	-	0.0666667	0.3
KEV	69.7565	27.0036	12-Jul-2010	-22.15	-68.2	SKKS	NULL	NULL	NULL	NULL	NULL	NULL	-0.126575	-0.0584685	0.00963837	-	no	57.3317	-24.5426	-	0.0666667	0.2
KEV	69.7565	27.0036	12-Jul-2010	-22.15	-68.2	SKS	NULL	NULL	NULL	NULL	NULL	NULL	-0.194997	-0.132751	-0.0705054	-	no	66.0688	-3.53111	-	0.0666667	0.2
KEV	69.7565	27.0036	16-Oct-2013	-6.45	154.93	SKKS	NULL	NULL	NULL	NULL	NULL	NULL	-0.0722925	0.0927567	0.257806	-	no	68.2809	104.486	-	0.0666667	0.2
KEV	69.7565	27.0036	16-Oct-2013	-6.45	154.93	SKS	NULL	NULL	NULL	NULL	NULL	NULL	-0.133066	-0.0516777	0.0297106	-	no	73.341	67.3202	-	0.0666667	0.2
KEV	69.7565	27.0036	25-Jul-2016	-26.11	-70.65	SKKS	NULL	NULL	NULL	NULL	NULL	NULL	-0.0929898	-0.0249587	0.0430724	-	no	58.218	-23.7696	-	0.0666667	0.2
KEV	69.7565	27.0036	25-Jul-2016	-26.11	-70.65	SKS	NULL	NULL	NULL	NULL	NULL	NULL	0.049729	0.120031	0.190333	-	no	66.6965	-1.46765	-	0.0666667	0.2
KEV	69.7565	27.0036	04-Aug-2016	-22.33	-66	SKKS	NULL	NULL	NULL	NULL	NULL	NULL	-0.311439	-0.178239	-0.0450381	-	no	56.726	-23.3271	-	0.0666667	0.2
KEV	69.7565	27.0036	04-Aug-2016	-22.33	-66	SKS	NULL	NULL	NULL	NULL	NULL	NULL	0.103692	0.17956	0.255428	-	no	65.6569	-3.12073	-	0.0666667	0.2
KIF	69.043	20.8037	03-Jun-2008	-10.51	161.27	SKKS	NULL	NULL	NULL	NULL	NULL	NULL	-0.197106	-0.159443	-0.12178	-	no	73.0558	100.791	-	0.0666667	0.2
KIF	69.043	20.8037	03-Jun-2008	-10.51	161.27	SKS	NULL	NULL	NULL	NULL	NULL	NULL	-0.272865	-0.177763	-0.0826609	-	no	74.9446	51.8249	-	0.0666667	0.2
KIF	69.043	20.8037	06-Jul-2012	-14.66	167.34	SKKS	NULL	NULL	NULL	NULL	NULL	NULL	-0.116876	-0.0715138	-0.0261519	-	no	75.547	100.701	-	0.0666667	0.2
KIF	69.043	20.8037	06-Jul-2012	-14.66	167.34	SKS	NULL	NULL	NULL	NULL	NULL	NULL	-0.0533236	0.00548095	0.0642855	-	no	75.4216	46.0787	-	0.0666667	0.2
KIF	69.043	20.8037	07-May-2015	-7.23	154.55	SKKS	NULL	NULL	NULL	NULL	NULL	NULL	-0.261533	-0.171336	-0.0811392	-	no	70.3805	99.0871	-	0.0666667	0.2
KIF	69.043	20.8037	07-May-2015	-7.23	154.55	SKS	NULL	NULL	NULL	NULL	NULL	NULL	-0.179132	-0.0890067	0.00111816	-	no	73.9649	57.0343	-	0.0666667	0.2
KIF	69.043	20.8037	31-Aug-2016	-3.69	152.79	SKKS	-13.1461	-0.986578	9.10112	1.1	1.3	1.6	-1.50949	-1.44785	-1.38622	-	no	69.8056	99.8276	-	0.0666667	0.2
KIF	69.043	20.8037	31-Aug-2016	-3.69	152.79	SKS	-13.1461	-2.98658	5.05618	1	1.2	1.4	-1.17996	-1.13591	-1.09186	-	no	73.8506	59.8871	-	0.0666667	0.2
KONO	59.6491	9.5982	02-Sep-2009	-7.78	107.3	SKKS	15.1685	27.307	45.5056	0.7	1	1.5	-0.852388	-0.756125	-0.659862	-	no	50.9375	56.63	-	0.0666667	0.26
KONO	59.6491	9.5982	02-Sep-2009	-7.78	107.3	SKS	19.2135	27.307	39.4382	0.8	1	1.3	-0.980116	-0.898956	-0.817796	-	no	56.9921	38.5531	-	0.0666667	0.26
KONO	59.6491	9.5982	31-Aug-2016	-3.69	152.79	SKKS	NULL	NULL	NULL	NULL	NULL	NULL	-0.202909	-0.0776414	0.047626	-	no	70.1129	62.6468	-	0.0666667	0.16
KONO	59.6491	9.5982	31-Aug-2016	-3.69	152.79	SKS	NULL	NULL	NULL	NULL	NULL	NULL	-0.149211	-0.0687015	0.0118081	-	no	66.5173	27.8049	-	0.0666667	0.16
KOVU	68.2229	20.1607	13-Apr-2014	-11.45	162.07	SKKS	NULL	NULL	NULL	NULL	NULL	NULL	-0.319931	-0.196565	-0.0731996	-	no	73.4108	97.0945	-	0.0666667	0.18
KOVU	68.2229	20.1607	13-Apr-2014	-11.45	162.07	SKS	NULL	NULL	NULL	NULL	NULL	NULL	0.0531812	0.107515	0.161849	-	no	74.2741	48.0051	-	0.0666667	0.18
KOVU	68.2229	20.1607	31-Aug-2016	-3.69	152.79	SKKS	NULL	NULL	NULL	NULL	NULL	NULL	-0.11598	-0.0532672	0.00944514	-	no	69.8701	96.9968	-	0.0666667	0.2
KOVU	68.2229	20.1607	31-Aug-2016	-3.69	152.79	SKS	NULL	NULL	NULL	NULL	NULL	NULL	-0.103188	-0.0206089	0.0619707	-	no	73.2917	56.8484	-	0.0666667	0.2
KU6	66.0255	29.8907	12-Jul-2007	-7.93	-74.38	SKKS	NULL	NULL	NULL	NULL	NULL	NULL	-0.0913527	-0.0394304	0.0124919	-	no	57.7738	-27.0238	-	0.0666667	0.18
KU6	66.0255	29.8907	12-Jul-2007	-7.93	-74.38	SKS	NULL	NULL	NULL	NULL	NULL	NULL	0.105133	0.147231	0.189329	-	no	64.439	-4.91722	-	0.0666667	0.18
KU6	66.0255	29.8907	04-Mar-2010	-22.23	-68.33	SKKS	NULL	NULL	NULL	NULL	NULL	NULL	-0.185822	-0.119414	-0.0530067	-	no	55.3974	-17.7707	-	0.0666667	0.18
KU6	66.0255	29.8907	04-Mar-2010	-22.23	-68.33	SKS	NULL	NULL	NULL	NULL	NULL	NULL	-0.185556	-0.029873	0.12581	-	no	63.1264	3.401	-	0.0666667	0.18
KU6	66.0255	29.8907	08-Jun-2011	-17.08	-69.52	SKKS	NULL	NULL	NULL	NULL	NULL	NULL	-0.0995281	0.0160977	0.131723	-	no	55.8799	-20.6685	-	0.0666667	0.22
KU6	66.0255	29.8907	08-Jun-2011	-17.08	-69.52	SKS	NULL	NULL	NULL	NULL	NULL	NULL	0.0243769	0.133959	0.243541	-	no	63.3333	0.598027	-	0.0666667	0.22
KU6	66.0255	29.8907	20-Jun-2011	-21.7	-68.23	SKKS	NULL	NULL	NULL	NULL	NULL	NULL	-0.26766	-0.196944	-0.126229	-	no	55.3834	-17.9676	-	0.0666667	0.2
KU6	66.0255	29.8907	20-Jun-2011	-21.7	-68.23	SKS	NULL	NULL	NULL	NULL	NULL	NULL	-0.152083	-0.0845547	-0.0170266	-	no	63.0928	3.08448	-	0.0666667	0.2
KU6	66.0255	29.8907	29-Jul-2011	-23.78	179.76	SKKS	NULL	NULL	NULL	NULL	NULL	NULL	0.0452517	0.123411	0.20157	-	no	74.9574	89.7052	-	0.0666667	0.2
KU6	66.0255	29.8907	29-Jul-2011	-23.78	179.76	SKS	NULL	NULL	NULL	NULL	NULL	NULL	0.030872	0.149953	0.269033	-	no	71.3059	45.0814	-	0.0666667	0.2
KU6	66.0255	29.8907	24-Aug-2014	-14.59	-73.58	SKKS	NULL	NULL	NULL	NULL	NULL	NULL	-0.00473066	0.0590799	0.12289	-	no	57.3405	-23.4475	-	0.0666667	0.28
KU6	66.0255	29.8907	24-Aug-2014	-14.59	-73.58	SKS	NULL	NULL	NULL	NULL	NULL	NULL	0.0652004	0.136143	0.207086	-	no	64.2526	-0.713828	-	0.0666667	0.28
KU6	66.0255	29.8907	01-Nov-2014	-19.7	-177.79	SKKS	NULL	NULL	NULL	NULL	NULL	NULL	-0.244434	-0.180205	-0.115975	-	no	76.4624	92.9382	-	0.0666667	0.2
KU6	66.0255	29.8907	01-Nov-2014	-19.7	-177.79	SKS	NULL	NULL	NULL	NULL	NULL	NULL	0.110827	0.162959	0.21509	-	no	72.1468	45.3533	-	0.0666667	0.2
LILU	65.2856	19.848	31-Aug-2016	-3.69	152.79	SKKS	NULL	NULL	NULL	NULL	NULL	NULL	-0.220363	-0.124581	-0.0287992	-	no	69.0195	87.8141	-	0.0666667	0.2
LILU	65.2856	19.848	31-Aug-2016	-3.69	152.79	SKS	NULL	NULL	NULL	NULL	NULL	NULL	0.0657006	0.168551	0.271401	-	no	70.6681	50.0332	-	0.0666667	0.2
LNKU	58.2232	15.5047	31-Aug-2016	-3.69	152.79	SKKS	1.01124	16.9536	27.3034	0.78	1.02	1.36	-0.845655	-0.789506	-0.733357	0.58574	yes	66.5259	65.9903	-	0.0666667	0.22
LNKU	58.2232	15.5047	31-Aug-2016	-3.69	152.79	SKS	NULL	NULL	NULL	NULL	NULL	NULL	-0.147617	-0.100369	-0.0531199	0.58574	yes	64.1827	34.6352	-	0.0666667	0.22
LOF	68.131	13.542	21-Jul-2014	-19.78	-178.44	SKKS	NULL	NULL	NULL	NULL	NULL	NULL	-0.0470898	-0.0142416	0.0186066	-	no	84.461	88.7465	-	0.0666667	0.2
LOF	68.131	13.542	21-Jul-2014	-19.78	-178.44	SKS	NULL	NULL	NULL	NULL	NULL	NULL	-0.0996816	-0.0638973	-0.028113	-	no	75.7324	21.9769	-	0.0666667	0.2
LOF	68.131	13.542	01-Nov-2014	-19.7	-177.79	SKKS	NULL	NULL	NULL	NULL	NULL	NULL	-0.0873947	-0.0393695	0.00865573	-	no	84.7575	89.9762	-	0.0666667	0.2
LOF	68.131	13.542	01-Nov-2014	-19.7	-177.79	SKS	NULL	NULL	NULL	NULL	NULL	NULL	-0.0557234	-0.0117969	0.0321296	-	no	75.802	21.5908	-	0.0666667	0.2
LUNU	55.632	13.446	21-Sep-2013	-7.26	119.96	SKKS	-85.9551	-69.6321	-47.5281	0.56	0.86	1.26	0.612763	0.693078	0.773392	-	no	51.4461	57.8683	-	0.0666667	0.2
LUNU	55.632	13.446	21-Sep-2013	-7.26	119.96	SKS	-55.618	-35.6321	-27.3034	0.6	0.9	1.32	0.624545	0.682922	0.741298	-	no	55.5375	37.629	-	0.0666667	0.2
LVZ	67.8979	34.6514	23-Jan-2015	-17	168.53	SKKS	-5.05618	7.82015	19.2135	0.8	0.9	1	-1.02396	-0.956984	-0.890003	-	no	69.937	102.152	-	0.0666667	0.2
LVZ	67.8979	34.6514	23-Jan-2015	-17	168.53	SKS	-17.191	-4.17985	9.10112	0.9	1.3	1.7	-1.27674	-1.16429	-1.05184	-	no	71.9731	61.31	-	0.0666667	0.2
LVZ	67.8979	34.6514	20-Oct-2015	-14.84	167.31	SKKS	-7.07865	2.3155	13.1461	0.8	1	1.2	-1.03173	-0.943726	-0.855723	-	no	69.472	103.429	-	0.0666667	0.26
LVZ	67.8979	34.6514	20-Oct-2015	-14.84	167.31	SKS	1.01124	10.3155	19.2135	0.8	1	1.1	-1.36747	-1.28722	-1.20697	-	no	71.9836	63.14	-	0.0666667	0.26
LVZ	67.8979	34.6514	25-Jul-2016	-26.11	-70.65	SKS	-39.4382	-16.4348	-11.1236	0.5	1	1.5	0.505721	0.588445	0.671169	0.30951	yes	66.3271	8.35596	-	0.0666667	0.26
LVZ	67.8979	34.6514	25-Jul-2016	-26.11	-70.65	SKKS	NULL	NULL	NULL	NULL	NULL	NULL	0.0736486	0.13493	0.196211	0.30951	yes	59.1529	-16.4741	-	0.0666667	0.26
LVZ	67.8979	34.6514	31-Aug-2016	-3.69	152.79	SKKS	-3.03371	6.92053	19.2135	1.1	1.4	1.8	-0.933301	-0.82337	-0.713438	-	no	64.1499	103.019	-	0.0666667	0.2
LVZ	67.8979	34.6514	31-Aug-2016	-3.69	152.79	SKS	3.03371	6.92053	9.10112	1.2	1.2	1.3	-1.15781	-1.09774	-1.03767	-	no	69.6336	73.912	-	0.0666667	0.2
LVZ	67.8979	34.6514	09-May-2017	-14.6	167.38	SKKS	-15.1685	-7.8443	-1.01124	1	1.3	1.5	-1.173	-1.10007	-1.02715	-	no	69.518	103.57	-	0.0666667	0.2
LVZ	67.8979	34.6514	09-May-2017	-14.6	167.38	SKS	-3.03371	14.1557	29.3258	0.8	1	1.3	-0.97018	-0.906771	-0.843363	-	no	72.016	63.2021	-	0.0666667	0.2
MEF	60.2172	24.3958	29-Apr-2008	-6.11	127.48	SKKS	29.3258	47.6301	61.6854	0.7	1.1	1.5	-1.03196	-0.953571	-0.875185	-	no	53.6928	73.8478	-	0.0666667	0.2
MEF	60.2172	24.3958	29-Apr-2008	-6.11	127.48	SKS	9.10112	27.6301	51.573	0.6	0.9	1.3	-0.863985	-0.803264	-0.742543	-	no	59.075	53.6489	-	0.0666667	0.18
MEF	60.2172	24.3958	08-Jul-2008	-15.99	-71.75	SKKS	NULL	NULL	NULL	NULL	NULL	NULL	-0.255068	-0.193329	-0.131591	-	no	50.1629	-19.1005	-	0.0666667	0.18
MEF	60.2172	24.3958	08-Jul-2008	-15.99	-71.75	SKS	NULL	NULL	NULL	NULL	NULL	NULL	-0.174747	-0.129516	-0.0842851	-	no	57.0025	-0.694037	-	0.0526667	0.16
MEF	60.2172	24.3958	08-Jun-2011	-17.08	-69.52	SKKS	NULL	NULL	NULL	NULL	NULL	NULL	-0.260559	-0.182558	-0.104557	-	no	49.3006	-18.0329	-	0.0526667	0.16
MEF	60.2172	24.3958	08-Jun-2011	-17.08	-69.52	SKS	NULL	NULL	NULL	NULL	NULL	NULL	-0.242469	-0.19528	-0.148091	-	no	56.4627	-0.306223	-	0.0666667	0.26
MEF	60.2172	24.3958	30-Aug-2011	-6.36	126.76	SKKS	17.191	32.3917	49.5506	0.6	0.8	1.1	-0.736558	-0.630827	-0.525096	-	no	53.4161	73.4963	-	0.0666667	0.26
MEF	60.2172	24.3958	30-Aug-2011	-6.36	126.76	SKS	19.2135	26.3917	37.4157	0.7	0.8	0.9	-0.708775	-0.677076	-0.645378	-	no	58.8916	53.5305	-	0.0606667	0.28
MEF	60.2172	24.3958	21-Sep-2013	-7.26	119.96	SKKS	31.3483	44.7984	59.6629	0.8	1.1	1.4	-1.03015	-0.913264	-0.796376	-	no	50.784	71.2638	-	0.0606667	0.28
MEF	60.2172	24.3958	21-Sep-2013	-7.26	119.96	SKS	23.2584	36.7984	61.6854	0.4	0.6	0.7	-0.59295	-0.550844	-0.508738	-	no	57.0565	53.7834	-	0.0666667	0.26
MEF	60.2172	24.3958	25-Jul-2016	-26.11	-70.65	SKKS	11.1236	34.4767	59.6629	0.44	0.64	0.94	-0.616608	-0.581029	-0.54545	0.54494	yes	49.0356	-14.3328	-	0.0666667	0.26
MEF	60.2172	24.3958	25-Jul-2016	-26.11	-70.65	SKS	NULL	NULL	NULL	NULL	NULL	NULL	-0.000510171	0.046417	0.0933442	0.54494	yes	56.5886	3.74427	-	0.0666667	0.22
MEF	60.2172	24.3958	04-Aug-2016	-22.33	-66	SKKS	NULL	NULL	NULL	NULL	NULL	NULL	-0.329261	-0.174677	-0.0200921	-	no	47.8276	-14.7304	-	0.0666667	0.22
MEF	60.2172	24.3958	04-Aug-2016	-22.33	-66	SKS	NULL	NULL	NULL	NULL	NULL	NULL	0.086307	0.177735	0.269164	-	no	55.6733	2.04738	-	0.0666667	0.2
MOR	66.286	14.735	31-Aug-2016	-3.69	152.79	SKKS	NULL	NULL	NULL	NULL	NULL	NULL	-0.128232	-0.0827996	-0.0373676	-	no	71.5263	87.8381	-	0.0666667	0.2
MOR	66.286	14.735	31-Aug-2016	-3.69	152.79	SKS	NULL	NULL	NULL	NULL	NULL	NULL	0.00880344	0.0745212	0.140239	-	no	72.6036	44.8392	-	0.0666667	0.2
MOR	66.286	14.735	09-May-2017	-14.6	167.38	SKKS	NULL	NULL	NULL	NULL	NULL	NULL	0.0523165	0.136785	0.221253	-	no	77.1684	84.0661	-	0.0666667	0.2
MOR	66.286	14.735	09-May-2017	-14.6	167.38	SKS	NULL	NULL	NULL	NULL	NULL	NULL	0.0767586	0.160028	0.243298	-	no	73.2788	32.3268	-	0.0666667	0.26
MOS	65.7875	19.0294	21-Jul-2014	-19.78	-178.44	SKKS	57.6404	64.5635	71.7978	1.04	1.2	1.38	1.32522	1.39624	1.46726	-	no	80.7824	77.3758	-	0.0666667	0.26
MOS	65.7875	19.0294	21-Jul-2014	-19.78	-178.44	SKS	51.573	60.5635	75.8427	0.78	0.98	1.2	1.11907	1.23243	1.34579	-	no	72.6973	29.0408	-	0.0666667	0.2
MSF	65.9113	29.0402	25-Aug-2006	-24.41	-67.03	SKKS	11.1236	26.9031	47.5281	0.4	0.5	0.9	-0.511001	-0.483946	-0.456891	0.498421	yes	54.6032	-16.6092	-	0.0666667	0.2
MSF	65.9113	29.0402	25-Aug-2006	-24.41	-67.03	SKS	NULL	NULL	NULL	NULL	NULL	NULL	0.0415296	0.0693905	0.0972514	0.498421	yes	62.5926	3.73043	-	0.0666667	0.26
MSF	65.9113	29.0402	23-May-2008	-7.06	129.48	SKKS	11.1236	27.3376	49.5506	0.5	0.9	1.4	-0.764175	-0.610098	-0.456021	-	no	56.3151	84.6236	-	0.0666667	0.26
MSF	65.9113	29.0402	23-May-2008	-7.06	129.48	SKS	27.3034	37.3376	47.5281	0.8	1	1.2	-1.21269	-1.10829	-1.00389	-	no	63.29	64.5248	-	0.0666667	0.2
MSF	65.9113	29.0402	12-Jul-2010	-22.15	-68.2	SKKS	NULL	NULL	NULL	NULL	NULL	NULL	-0.218582	-0.143309	-0.0680371	-	no	54.9885	-18.146	-	0.0666667	0.2
MSF	65.9113	29.0402	12-Jul-2010	-22.15	-68.2	SKS	NULL	NULL	NULL	NULL	NULL	NULL	-0.0305545	0.026293	0.0831405	-	no	62.7991	2.55612	-	0.0666667	0.2
MSF	65.9113	29.0402	08-Jun-2011	-17.08	-69.52	SKKS	NULL	NULL	NULL	NULL	NULL	NULL	-0.268453	-0.163752	-0.059051	-	no	55.5075	-21.0341	-	0.0666667	0.2
MSF	65.9113	29.0402	08-Jun-2011	-17.08	-69.52	SKS	NULL	NULL	NULL	NULL	NULL	NULL	0.00341447	0.0918611	0.180308	-	no	63.0314	-0.152544	-	0.0666667	0.2
MSF	65.9113	29.0402	28-May-2012	-28.04	-63.09	SKKS	NULL	NULL	NULL	NULL	NULL	NULL	-0.276567	-0.189794	-0.103021	-	no	53.5307	-13.2192	-	0.0666667	0.16
MSF	65.9113	29.0402	28-May-2012	-28.04	-63.09	SKS	NULL	NULL	NULL	NULL	NULL	NULL	-0.0737168	-0.0163575	0.0410019	-	no	61.9615	5.79706	-	0.0666667	0.2
MSF	65.9113	29.0402	21-Jul-2014	-19.78	-178.44	SKKS	NULL	NULL	NULL	NULL	NULL	NULL	0.107323	0.14988	0.192438	-	no	76.4775	91.1751	-	0.0666667	0.2
MSF	65.9113	29.0402	21-Jul-2014	-19.78	-178.44	SKS	NULL	NULL	NULL	NULL	NULL	NULL	0.0921755	0.131676	0.171176	-	no	71.9826	44.0955	-	0.0666667	0.2
MSF	65.9113	29.0402	01-Nov-2014	-19.7	-177.79	SKKS	NULL	NULL	NULL	NULL	NULL	NULL	0.123304	0.164985	0.206666	-	no	76.7621	91.6751	-	0.0666667	0.2
MSF	65.9113	29.0402	01-Nov-2014	-19.7	-177.79	SKS	NULL	NULL	NULL	NULL	NULL	NULL	0.0998515	0.197735	0.295618	-	no	72.1016	43.9745	-	0.0666667	0.2
MSF	65.9113	29.0402	14-Jun-2016	-18.77	168.82	SKKS	NULL	NULL	NULL	NULL	NULL	NULL	-0.155769	-0.0544739	0.0468211	-	no	71.0754	91.2732	-	0.0666667	0.2
MSF	65.9113	29.0402	14-Jun-2016	-18.77	168.82	SKS	NULL	NULL	NULL	NULL	NULL	NULL	-0.201505	-0.114557	-0.027608	-	no	70.6416	49.9847	-	0.0666667	0.26
MSF	65.9113	29.0402	25-Jul-2016	-26.11	-70.65	SKKS	13.1461	25.3063	49.5506	0.4	0.7	1	-0.612817	-0.569449	-0.526081	0.534698	yes	55.6945	-17.1356	-	0.0666667	0.26
MSF	65.9113	29.0402	25-Jul-2016	-26.11	-70.65	SKS	NULL	NULL	NULL	NULL	NULL	NULL	0.00861751	0.0620643	0.115511	0.534698	yes	63.2905	4.53699	-	0.0666667	0.26
MSF	65.9113	29.0402	23-Aug-2016	-7.28	122.45	SKKS	17.191	31.8762	49.5506	0.5	0.8	1.2	-0.881747	-0.810205	-0.738663	-	no	53.9802	81.2304	-	0.0666667	0.26
MSF	65.9113	29.0402	23-Aug-2016	-7.28	122.45	SKS	19.2135	23.8762	29.3258	1	1.2	1.4	-0.867522	-0.762977	-0.658433	-	no	61.4621	63.8772	-	0.0666667	0.2
MSF	65.9113	29.0402	31-Aug-2016	-3.69	152.79	SKKS	-13.1461	-0.0419934	9.10112	1.2	1.7	2.3	-0.914451	-0.840862	-0.767273	-	no	65.5051	95.405	-	0.0666667	0.26
MSF	65.9113	29.0402	31-Aug-2016	-3.69	152.79	SKS	-9.10112	3.95801	19.2135	0.6	0.7	0.9	-0.778072	-0.724615	-0.671158	-	no	69.2998	63.2334	-	0.0666667	0.2
MTSE	58.7144	23.8146	21-Jul-2007	-22.15	-65.78	SKKS	NULL	NULL	NULL	NULL	NULL	NULL	0.0535226	0.111241	0.16896	-	no	46.2037	-14.0172	-	0.0666667	0.2
MTSE	58.7144	23.8146	21-Jul-2007	-22.15	-65.78	SKS	NULL	NULL	NULL	NULL	NULL	NULL	0.124012	0.180024	0.236037	-	no	53.971	2.15607	-	0.0666667	0.2
MTSE	58.7144	23.8146	08-Jul-2008	-15.99	-71.75	SKKS	NULL	NULL	NULL	NULL	NULL	NULL	0.0659783	0.107883	0.149789	-	no	48.6739	-18.2021	-	0.0666667	0.2
MTSE	58.7144	23.8146	08-Jul-2008	-15.99	-71.75	SKS	NULL	NULL	NULL	NULL	NULL	NULL	0.0488009	0.0915971	0.134393	-	no	55.3898	-0.363342	-	0.0666667	0.2
MTSE	58.7144	23.8146	24-Aug-2014	-14.59	-73.58	SKKS	NULL	NULL	NULL	NULL	NULL	NULL	-0.00332778	0.0369283	0.0771843	-	no	49.4709	-19.2125	-	0.0666667	0.2
MTSE	58.7144	23.8146	24-Aug-2014	-14.59	-73.58	SKS	NULL	NULL	NULL	NULL	NULL	NULL	0.0846467	0.120098	0.15555	-	no	55.8608	-0.871648	-	0.0666667	0.2
MTSE	58.7144	23.8146	24-Sep-2014	-23.85	-66.55	SKKS	NULL	NULL	NULL	NULL	NULL	NULL	-0.104061	-0.0250432	0.0539747	-	no	46.3038	-13.5247	-	0.0666667	0.2
MTSE	58.7144	23.8146	24-Sep-2014	-23.85	-66.55	SKS	NULL	NULL	NULL	NULL	NULL	NULL	-0.145246	-0.0788193	-0.0123926	-	no	54.1197	2.86027	-	0.0666667	0.24
N1316	65.207	16.1439	21-Jul-2014	-19.78	-178.44	SKKS	63.7079	77.0849	87.9775	0.72	0.98	1.3	0.919633	0.98307	1.04651	-	no	81.5972	68.2683	-	0.0666667	0.24
N1316	65.207	16.1439	21-Jul-2014	-19.78	-178.44	SKS	57.6404	77.0849	-92.0225	0.68	1.02	1.46	0.816324	0.901214	0.986104	-	no	72.221	24.28	-	0.0666667	0.26
N1320	65.744	16.1918	21-Jul-2014	-19.78	-178.44	SKKS	53.5955	64.981	75.8427	0.8	0.96	1.14	1.033	1.0753	1.11759	-	no	81.9759	71.8068	-	0.0666667	0.26
N1320	65.744	16.1918	21-Jul-2014	-19.78	-178.44	SKS	41.4607	48.981	59.6629	0.88	1.12	1.42	0.818747	0.899566	0.980385	-	no	72.8378	24.6666	-	0.0666667	0.2
N2IH	67.9662	15.9367	07-May-2015	-7.23	154.55	SKKS	NULL	NULL	NULL	NULL	NULL	NULL	0.0205873	0.0631534	0.105719	-	no	72.0434	93.4165	-	0.0666667	0.2
N2IH	67.9662	15.9367	07-May-2015	-7.23	154.55	SKS	NULL	NULL	NULL	NULL	NULL	NULL	0.039414	0.128671	0.217928	-	no	73.9418	47.5903	-	0.0666667	0.2
NAO01	60.8442	10.8865	31-Aug-2016	-3.69	152.79	SKKS	NULL	NULL	NULL	NULL	NULL	NULL	-0.0235759	0.169579	0.362735	-	no	70.4056	67.3058	-	0.0666667	0.2
NAO01	60.8442	10.8865	31-Aug-2016	-3.69	152.79	SKS	NULL	NULL	NULL	NULL	NULL	NULL	-0.188686	-0.124803	-0.0609194	-	no	67.6288	30.8457	-	0.0666667	0.2
NASU	58.9278	13.1862	25-Jul-2016	-26.11	-70.65	SKKS	NULL	NULL	NULL	NULL	NULL	NULL	0.026672	0.0706118	0.114552	-	no	44.2501	-21.8025	-	0.0666667	0.2
NASU	58.9278	13.1862	25-Jul-2016	-26.11	-70.65	SKS	NULL	NULL	NULL	NULL	NULL	NULL	-0.207078	-0.131098	-0.0551183	-	no	52.9182	-7.12094	-	0.0666667	0.2
NB201	61.0495	11.2939	24-Oct-2009	-6.13	130.38	SKKS	NULL	NULL	NULL	NULL	NULL	NULL	0.0654717	0.149654	0.233835	-	no	60.5547	65.6103	-	0.0666667	0.2
NB201	61.0495	11.2939	24-Oct-2009	-6.13	130.38	SKS	NULL	NULL	NULL	NULL	NULL	NULL	0.0140874	0.080586	0.147085	-	no	63.5642	38.4553	-	0.0666667	0.2
NB201	61.0495	11.2939	30-Aug-2011	-6.36	126.76	SKKS	NULL	NULL	NULL	NULL	NULL	NULL	-0.19742	-0.107288	-0.0171549	-	no	59.16	64.4103	-	0.0666667	0.2
NB201	61.0495	11.2939	30-Aug-2011	-6.36	126.76	SKS	NULL	NULL	NULL	NULL	NULL	NULL	0.127203	0.191724	0.256245	-	no	62.7775	38.8225	-	0.0666667	0.18
NBO00	61.0307	10.7774	23-Apr-2000	-28.31	-62.99	SKKS	NULL	NULL	NULL	NULL	NULL	NULL	0.00648234	0.084633	0.162784	-	no	43.5881	-21.3437	-	0.0666667	0.18
NBO00	61.0307	10.7774	23-Apr-2000	-28.31	-62.99	SKS	NULL	NULL	NULL	NULL	NULL	NULL	-0.277395	-0.192851	-0.108307	-	no	53.2789	-8.69874	-	0.0666667	0.18
NBO00	61.0307	10.7774	24-Oct-2009	-6.13	130.38	SKKS	NULL	NULL	NULL	NULL	NULL	NULL	-0.00673629	0.0674253	0.141587	-	no	60.7509	65.1664	-	0.0666667	0.2
NBO00	61.0307	10.7774	24-Oct-2009	-6.13	130.38	SKS	NULL	NULL	NULL	NULL	NULL	NULL	0.0886666	0.146685	0.204703	-	no	63.6542	37.7826	-	0.0666667	0.2
NBO00	61.0307	10.7774	02-Sep-2011	-28.4	-63.07	SKKS	NULL	NULL	NULL	NULL	NULL	NULL	-0.0790292	0.0536763	0.186382	-	no	43.5913	-21.3543	-	0.0666667	0.2
NBO00	61.0307	10.7774	02-Sep-2011	-28.4	-63.07	SKS	NULL	NULL	NULL	NULL	NULL	NULL	-0.294277	-0.192244	-0.0902116	-	no	53.2899	-8.68972	-	0.0666667	0.24
NBO00	61.0307	10.7774	06-Apr-2013	-3.52	138.48	SKKS	NULL	NULL	NULL	NULL	NULL	NULL	0.0266353	0.128738	0.230841	-	no	64.4108	67.8773	-	0.0666667	0.24
NBO00	61.0307	10.7774	06-Apr-2013	-3.52	138.48	SKS	NULL	NULL	NULL	NULL	NULL	NULL	-0.273762	-0.0161643	0.241433	-	no	65.5716	36.7894	-	0.0666667	0.2
NBO00	61.0307	10.7774	25-Jul-2016	-26.11	-70.65	SKKS	NULL	NULL	NULL	NULL	NULL	NULL	0.0706181	0.138468	0.206319	-	no	45.5337	-24.9211	-	0.0666667	0.2
NBO00	61.0307	10.7774	25-Jul-2016	-26.11	-70.65	SKS	NULL	NULL	NULL	NULL	NULL	NULL	-0.238388	-0.101718	0.0349514	-	no	54.6076	-10.3742	-	0.0666667	0.17
NC204	61.2759	10.7629	02-Sep-2011	-28.4	-63.07	SKKS	NULL	NULL	NULL	NULL	NULL	NULL	-0.050613	0.0946804	0.239974	-	no	43.8304	-21.5036	-	0.0666667	0.17
NC204	61.2759	10.7629	02-Sep-2011	-28.4	-63.07	SKS	NULL	NULL	NULL	NULL	NULL	NULL	0.0361033	0.155455	0.274806	-	no	53.5504	-8.79443	-	0.0666667	0.2
NC204	61.2759	10.7629	28-May-2016	-56.2	-26.89	SKKS	NULL	NULL	NULL	NULL	NULL	NULL	-0.291461	-0.195784	-0.100108	-	no	39.1204	-0.915454	-	0.0666667	0.2
NC204	61.2759	10.7629	28-May-2016	-56.2	-26.89	SKS	NULL	NULL	NULL	NULL	NULL	NULL	-0.203837	-0.115947	-0.0280564	-	no	51.8925	4.3382	-	0.0666667	0.26
NC204	61.2759	10.7629	25-Jul-2016	-26.11	-70.65	SKKS	NULL	NULL	NULL	NULL	NULL	NULL	-0.0216843	0.0545671	0.130819	-	no	45.764	-25.0981	-	0.0666667	0.26
NC204	61.2759	10.7629	25-Jul-2016	-26.11	-70.65	SKS	NULL	NULL	NULL	NULL	NULL	NULL	-0.152548	-0.0192242	0.1141	-	no	54.8579	-10.5078	-	0.0746667	0.24
NC204	61.2759	10.7629	31-Aug-2016	-3.69	152.79	SKKS	NULL	NULL	NULL	NULL	NULL	NULL	-0.278037	-0.175651	-0.0732645	-	no	70.747	68.3686	-	0.0746667	0.24
NC204	61.2759	10.7629	31-Aug-2016	-3.69	152.79	SKS	NULL	NULL	NULL	NULL	NULL	NULL	-0.240266	-0.111142	0.0179815	-	no	68.1109	31.1754	-	0.0666667	0.2
NC303	61.2251	11.369	25-Jul-2016	-26.11	-70.65	SKKS	NULL	NULL	NULL	NULL	NULL	NULL	0.00844649	0.0338977	0.0593489	-	no	45.8984	-24.6415	-	0.0666667	0.2
NC303	61.2251	11.369	25-Jul-2016	-26.11	-70.65	SKS	NULL	NULL	NULL	NULL	NULL	NULL	-0.00558388	0.0479093	0.101402	-	no	54.9225	-9.92869	-	0.0666667	0.2
NC303	61.2251	11.369	31-Aug-2016	-3.69	152.79	SKKS	-17.191	5.62909	21.236	0.55	0.75	1	-0.97516	-0.86968	-0.7642	0.803466	yes	70.4526	68.8436	-	0.0666667	0.2
NC303	61.2251	11.369	31-Aug-2016	-3.69	152.79	SKS	NULL	NULL	NULL	NULL	NULL	NULL	0.0392659	0.13176	0.224254	0.803466	yes	67.9818	32.0351	-	0.0666667	0.18
NC405	61.1128	11.7153	24-Oct-2009	-6.13	130.38	SKKS	NULL	NULL	NULL	NULL	NULL	NULL	0.0738182	0.138091	0.202364	-	no	60.4265	66.0549	-	0.0666667	0.2
NC405	61.1128	11.7153	24-Oct-2009	-6.13	130.38	SKS	NULL	NULL	NULL	NULL	NULL	NULL	-0.102634	-0.0162133	0.0702079	-	no	63.5359	39.0619	-	0.0666667	0.2
NC602	60.7353	11.5414	30-Aug-2011	-6.36	126.76	SKKS	NULL	NULL	NULL	NULL	NULL	NULL	-0.0997451	0.0613509	0.222447	-	no	58.844	64.1196	-	0.0666667	0.2
NC602	60.7353	11.5414	30-Aug-2011	-6.36	126.76	SKS	NULL	NULL	NULL	NULL	NULL	NULL	-0.0976599	-0.0725689	-0.0474779	-	no	62.426	38.783	-	0.0666667	0.28
NIKU	67.8673	19.0347	21-Jul-2014	-19.78	-178.44	SKKS	47.5281	55.8711	65.7303	0.9	1.12	1.36	1.06443	1.16188	1.25933	-	no	81.9161	92.2583	-	0.0666667	0.28
NIKU	67.8673	19.0347	21-Jul-2014	-19.78	-178.44	SKS	47.5281	57.8711	71.7978	0.68	0.86	1.08	0.787275	0.852181	0.917088	-	no	75.0606	30.729	-	0.0666667	0.2
NIKU	67.8673	19.0347	20-Oct-2015	-14.84	167.31	SKKS	NULL	NULL	NULL	NULL	NULL	NULL	0.0683908	0.164118	0.259846	-	no	75.901	94.4106	-	0.0666667	0.2
NIKU	67.8673	19.0347	20-Oct-2015	-14.84	167.31	SKS	NULL	NULL	NULL	NULL	NULL	NULL	0.0401223	0.0901833	0.140244	-	no	74.4209	41.1824	-	0.0666667	0.2
NIKU	67.8673	19.0347	31-Aug-2016	-3.69	152.79	SKKS	NULL	NULL	NULL	NULL	NULL	NULL	0.0148024	0.0908871	0.166972	-	no	70.2341	95.3314	-	0.0666667	0.22
NIKU	67.8673	19.0347	31-Aug-2016	-3.69	152.79	SKS	NULL	NULL	NULL	NULL	NULL	NULL	0.0742032	0.140843	0.207482	-	no	73.2207	54.486	-	0.0666667	0.2
NOD	63.4428	14.8573	23-Aug-2016	-7.28	122.45	SKKS	-92.0225	-76.6098	-53.5955	0.5	1	1.64	0.462781	0.573425	0.684068	-	no	57.6192	69.0239	-	0.0666667	0.2
NOD	63.4428	14.8573	23-Aug-2016	-7.28	122.45	SKS	-71.7978	-48.6098	-37.4157	0.58	0.78	1.1	0.79123	0.863038	0.934846	-	no	63.1038	45.971	-	0.0666667	0.18
NOD	63.4428	14.8573	31-Aug-2016	-3.69	152.79	SKKS	NULL	NULL	NULL	NULL	NULL	NULL	-0.237665	-0.18205	-0.126435	-	no	70.2446	78.7597	-	0.0666667	0.18
NOD	63.4428	14.8573	31-Aug-2016	-3.69	152.79	SKS	NULL	NULL	NULL	NULL	NULL	NULL	-0.225866	-0.120204	-0.0145417	-	no	69.745	39.8839	-	0.0666667	0.2
NRAU	59.5704	15.0401	15-Apr-2017	-23.24	-67.65	SKKS	NULL	NULL	NULL	NULL	NULL	NULL	-0.0949636	-0.0141475	0.0666685	-	no	44.6362	-21.2251	-	0.0666667	0.2
NRAU	59.5704	15.0401	15-Apr-2017	-23.24	-67.65	SKS	NULL	NULL	NULL	NULL	NULL	NULL	0.0791301	0.168709	0.258288	-	no	53.2478	-6.74864	-	0.0666667	0.2
NRTU	59.6769	18.6308	24-Sep-2014	-23.85	-66.55	SKKS	NULL	NULL	NULL	NULL	NULL	NULL	-0.196231	-0.163389	-0.130548	-	no	45.5286	-18.1034	-	0.0666667	0.2
NRTU	59.6769	18.6308	24-Sep-2014	-23.85	-66.55	SKS	NULL	NULL	NULL	NULL	NULL	NULL	-0.222174	-0.0963682	0.0294377	-	no	53.9693	-2.89276	-	0.0666667	0.2
NSS	64.5307	11.9673	28-May-2016	-56.2	-26.89	SKKS	NULL	NULL	NULL	NULL	NULL	NULL	-0.299863	-0.175217	-0.050571	-	no	43.0707	-0.91463	-	0.0666667	0.2
NSS	64.5307	11.9673	28-May-2016	-56.2	-26.89	SKS	NULL	NULL	NULL	NULL	NULL	NULL	0.0160392	0.1034	0.19076	-	no	55.8127	4.92446	-	0.0666667	0.2
NYNU	59.0047	18.0042	04-Aug-2016	-22.33	-66	SKKS	NULL	NULL	NULL	NULL	NULL	NULL	-0.0700165	-0.00307164	0.0638732	-	no	44.6134	-18.5679	-	0.0666667	0.2
NYNU	59.0047	18.0042	04-Aug-2016	-22.33	-66	SKS	NULL	NULL	NULL	NULL	NULL	NULL	-0.0582844	0.00679047	0.0718654	-	no	52.9756	-3.86356	-	0.0666667	0.2
ODEU	64.4085	20.7162	23-Aug-2016	-7.28	122.45	SKKS	NULL	NULL	NULL	NULL	NULL	NULL	0.0760287	0.150493	0.224956	-	no	56.0042	74.3271	-	0.0666667	0.2
ODEU	64.4085	20.7162	23-Aug-2016	-7.28	122.45	SKS	NULL	NULL	NULL	NULL	NULL	NULL	0.127647	0.163936	0.200225	-	no	62.4726	53.5534	-	0.0666667	0.2
OSKU	57.1947	16.0994	21-Sep-2013	-7.26	119.96	SKKS	NULL	NULL	NULL	NULL	NULL	NULL	-0.1898	-0.068785	0.0522303	-	no	51.6734	61.7106	-	0.0666667	0.16
OSKU	57.1947	16.0994	21-Sep-2013	-7.26	119.96	SKS	NULL	NULL	NULL	NULL	NULL	NULL	0.0383132	0.0933651	0.148417	-	no	56.4156	41.9278	-	0.0666667	0.16
OSTU	60.2298	17.1342	04-Aug-2016	-22.33	-66	SKKS	NULL	NULL	NULL	NULL	NULL	NULL	-0.0328448	0.0272419	0.0873286	-	no	45.4732	-20.0086	-	0.0666667	0.26
OSTU	60.2298	17.1342	04-Aug-2016	-22.33	-66	SKS	NULL	NULL	NULL	NULL	NULL	NULL	-0.262701	-0.184607	-0.106513	-	no	54.0272	-5.29674	-	0.0666667	0.26
OSTU	60.2298	17.1342	31-Aug-2016	-3.69	152.79	SKKS	NULL	NULL	NULL	NULL	NULL	NULL	-0.199697	-0.129079	-0.0584611	-	no	67.3067	72.2586	-	0.0666667	0.2
OSTU	60.2298	17.1342	31-Aug-2016	-3.69	152.79	SKS	NULL	NULL	NULL	NULL	NULL	NULL	0.141092	0.192618	0.244145	-	no	66.0663	38.9261	-	0.0666667	0.2
OUL	65.0853	25.8964	21-Jul-2007	-22.15	-65.78	SKKS	NULL	NULL	NULL	NULL	NULL	NULL	0.0937973	0.140388	0.186978	-	no	52.5901	-18.1706	-	0.0666667	0.2
OUL	65.0853	25.8964	21-Jul-2007	-22.15	-65.78	SKS	NULL	NULL	NULL	NULL	NULL	NULL	-0.172363	-0.0998566	-0.0273498	-	no	60.8405	0.272294	-	0.0666667	0.2
OUL	65.0853	25.8964	08-Jul-2008	-15.99	-71.75	SKKS	NULL	NULL	NULL	NULL	NULL	NULL	-0.15325	-0.109136	-0.0650223	-	no	54.5764	-23.3298	-	0.0666667	0.26
OUL	65.0853	25.8964	08-Jul-2008	-15.99	-71.75	SKS	NULL	NULL	NULL	NULL	NULL	NULL	-0.206942	-0.138669	-0.0703967	-	no	62.0241	-3.11779	-	0.0666667	0.26
OUL	65.0853	25.8964	28-Aug-2009	-7.15	123.43	SKKS	39.4382	50.1877	59.6629	0.7	0.9	1.1	-1.01876	-0.87903	-0.739296	-	no	54.9603	78.7521	-	0.0666667	0.2
OUL	65.0853	25.8964	28-Aug-2009	-7.15	123.43	SKS	23.2584	44.1877	65.7303	0.6	0.9	1.2	-0.859759	-0.767446	-0.675133	-	no	61.9557	59.6843	-	0.0666667	0.2
OUL	65.0853	25.8964	04-Mar-2010	-22.23	-68.33	SKKS	NULL	NULL	NULL	NULL	NULL	NULL	0.0363768	0.148444	0.260511	-	no	53.3289	-19.1712	-	0.0666667	0.2
OUL	65.0853	25.8964	04-Mar-2010	-22.23	-68.33	SKS	NULL	NULL	NULL	NULL	NULL	NULL	-0.0994726	0.0111142	0.121701	-	no	61.3674	0.220142	-	0.0666667	0.2
OUL	65.0853	25.8964	12-Jul-2010	-22.15	-68.2	SKKS	NULL	NULL	NULL	NULL	NULL	NULL	-0.102334	-0.0771564	-0.0519787	-	no	53.2926	-19.1543	-	0.0666667	0.2
OUL	65.0853	25.8964	12-Jul-2010	-22.15	-68.2	SKS	NULL	NULL	NULL	NULL	NULL	NULL	0.0405129	0.127553	0.214594	-	no	61.3377	0.177339	-	0.0666667	0.2
OUL	65.0853	25.8964	30-Aug-2011	-6.36	126.76	SKKS	21.236	50.8051	67.7528	0.6	1	1.6	-1.0753	-0.975902	-0.876507	-	no	56.1083	80.5963	-	0.0666667	0.26
OUL	65.0853	25.8964	30-Aug-2011	-6.36	126.76	SKS	53.5955	60.8051	67.7528	0.7	0.9	1.2	-0.627452	-0.596503	-0.565554	-	no	62.7853	60.3614	-	0.0666667	0.26
OUL	65.0853	25.8964	28-Jul-2012	-4.65	153.17	SKKS	21.236	31.0898	39.4382	0.9	1.2	1.6	-0.341763	-0.243628	-0.145493	0.12649	yes	66.3806	91.5662	-	0.0666667	0.2
OUL	65.0853	25.8964	28-Jul-2012	-4.65	153.17	SKS	NULL	NULL	NULL	NULL	NULL	NULL	-0.0190028	0.0314622	0.0819273	0.12649	yes	69.2453	57.5505	-	0.0666667	0.2
OUL	65.0853	25.8964	13-Apr-2014	-11.45	162.07	SKKS	NULL	NULL	NULL	NULL	NULL	NULL	-0.222933	-0.114258	-0.00558321	-	no	69.6584	89.8679	-	0.0666667	0.2
OUL	65.0853	25.8964	13-Apr-2014	-11.45	162.07	SKS	NULL	NULL	NULL	NULL	NULL	NULL	0.1321	0.192641	0.253182	-	no	70.1443	50.4814	-	0.0666667	0.2
OUL	65.0853	25.8964	04-Aug-2016	-22.33	-66	SKKS	NULL	NULL	NULL	NULL	NULL	NULL	0.00662275	0.0951255	0.183628	-	no	52.6437	-18.1912	-	0.0666667	0.2
OUL	65.0853	25.8964	04-Aug-2016	-22.33	-66	SKS	NULL	NULL	NULL	NULL	NULL	NULL	-0.283642	-0.180397	-0.0771522	-	no	60.8825	0.324239	-	0.0666667	0.2
OUL	65.0853	25.8964	31-Aug-2016	-3.69	152.79	SKKS	21.236	33.1045	39.4382	1	1.3	1.7	-1.05796	-0.980192	-0.902426	0.7057	yes	66.4063	91.4111	-	0.0666667	0.2
OUL	65.0853	25.8964	31-Aug-2016	-3.69	152.79	SKS	NULL	NULL	NULL	NULL	NULL	NULL	-0.196727	-0.15684	-0.116953	0.7057	yes	69.2451	57.6879	-	0.0666667	0.2
PAJU	67.024	23.113	01-Nov-2014	-19.7	-177.79	SKKS	77.8652	78.3503	83.9326	1.54	1.66	1.82	1.91822	2.01413	2.11004	-	no	80.012	91.2832	-	0.0666667	0.18
PAJU	67.024	23.113	01-Nov-2014	-19.7	-177.79	SKS	71.7978	74.3503	81.9101	1.82	2.06	2.28	2.32596	2.51433	2.7027	-	no	73.8817	36.0982	-	0.0666667	0.18
PAJU	67.024	23.113	20-Oct-2015	-14.84	167.31	SKKS	NULL	NULL	NULL	NULL	NULL	NULL	-0.0260676	0.0605078	0.147083	-	no	73.841	93.2297	-	0.0666667	0.2
PAJU	67.024	23.113	20-Oct-2015	-14.84	167.31	SKS	NULL	NULL	NULL	NULL	NULL	NULL	0.0399371	0.135239	0.230542	-	no	72.9516	45.7456	-	0.0666667	0.2
PAJU	67.024	23.113	25-Jul-2016	-26.11	-70.65	SKKS	NULL	NULL	NULL	NULL	NULL	NULL	-0.235095	-0.141954	-0.0488122	-	no	54.7744	-22.3043	-	0.0666667	0.22
PAJU	67.024	23.113	25-Jul-2016	-26.11	-70.65	SKS	NULL	NULL	NULL	NULL	NULL	NULL	0.0908567	0.145997	0.201137	-	no	63.2558	-2.37406	-	0.0666667	0.22
PAJU	67.024	23.113	31-Aug-2016	-3.69	152.79	SKKS	-3.03371	3.8324	7.07865	1.4	1.58	1.76	-0.841253	-0.715091	-0.588928	-	no	68.3348	94.8574	-	0.0666667	0.2
PAJU	67.024	23.113	31-Aug-2016	-3.69	152.79	SKS	-11.1236	-2.1676	3.03371	0.92	1.08	1.24	-1.2243	-1.15565	-1.08699	-	no	71.5956	57.8473	-	0.0666667	0.2
PUL	59.767	30.317	15-Sep-1999	-20.93	-67.28	SKKS	11.1236	11.4803	11.1236	2	2.1	2.2	-0.647759	-0.51841	-0.389061	0.127603	yes	49.9394	-10.8124	-	0.0666667	0.26
PUL	59.767	30.317	15-Sep-1999	-20.93	-67.28	SKS	NULL	NULL	NULL	NULL	NULL	NULL	-0.261458	-0.193092	-0.124727	0.127603	yes	56.7976	8.01885	-	0.0666667	0.26
PUL	59.767	30.317	23-Apr-2000	-28.31	-62.99	SKKS	9.10112	19.4965	31.3483	0.6	0.8	1.1	-0.687242	-0.626135	-0.565029	0.397379	yes	48.1288	-6.25467	-	0.0666667	0.2
PUL	59.767	30.317	23-Apr-2000	-28.31	-62.99	SKS	NULL	NULL	NULL	NULL	NULL	NULL	-0.16765	-0.144782	-0.121914	0.397379	yes	55.8565	11.0566	-	0.0666667	0.2
PUL	59.767	30.317	30-Aug-2008	-6.15	147.26	SKKS	9.10112	29.2794	45.5056	0.8	1.2	1.6	-0.892626	-0.744083	-0.59554	-	no	58.7776	82.2319	-	0.0666667	0.24
PUL	59.767	30.317	30-Aug-2008	-6.15	147.26	SKS	9.10112	33.2794	49.5506	0.6	0.9	1.3	-0.875231	-0.790782	-0.706332	-	no	61.8789	56.5998	-	0.0666667	0.24
PUL	59.767	30.317	28-Jul-2012	-4.65	153.17	SKKS	1.01124	17.0157	35.3933	0.6	0.8	1	-0.875893	-0.79804	-0.720188	-	no	61.392	83.8194	-	0.0666667	0.2
PUL	59.767	30.317	28-Jul-2012	-4.65	153.17	SKS	1.01124	19.0157	37.4157	0.6	0.9	1.2	-0.88663	-0.82405	-0.761469	-	no	63.2519	55.8263	-	0.0666667	0.2
PUL	59.767	30.317	01-Nov-2014	-19.7	-177.79	SKKS	NULL	NULL	NULL	NULL	NULL	NULL	-0.213047	-0.15367	-0.0942928	-	no	71.1328	73.1896	-	0.0666667	0.2
PUL	59.767	30.317	01-Nov-2014	-19.7	-177.79	SKS	NULL	NULL	NULL	NULL	NULL	NULL	0.0313007	0.0744602	0.11762	-	no	65.0926	41.3508	-	0.0666667	0.2
PUL	59.767	30.317	31-Aug-2016	-3.69	152.79	SKKS	1.01124	12.9168	23.2584	1	1.1	1.4	-1.15433	-1.10958	-1.06483	-	no	61.4585	83.7009	-	0.0666667	0.2
PUL	59.767	30.317	31-Aug-2016	-3.69	152.79	SKS	-3.03371	12.9168	29.3258	0.7	0.9	1.2	-0.863329	-0.82421	-0.78509	-	no	63.2781	55.9587	-	0.0666667	0.2
PVF	60.5454	25.859	31-Aug-2016	-3.69	152.79	SKKS	1.01124	6.4152	13.1461	1.6	1.8	2.1	-1.50621	-1.26293	-1.01965	-	no	63.843	81.1513	-	0.0666667	0.26
PVF	60.5454	25.859	31-Aug-2016	-3.69	152.79	SKS	-23.2584	-7.5848	21.236	0.5	1.1	2	-0.680701	-0.569431	-0.458162	-	no	64.8976	51.0479	-	0.0666667	0.26
PVF	60.5454	25.859	21-Sep-2013	-7.26	119.96	SKKS	29.3258	44.0214	63.7079	0.4	0.6	0.7	-0.619285	-0.552061	-0.484838	-	no	50.4666	72.6574	-	0.0666667	0.26
PVF	60.5454	25.859	21-Sep-2013	-7.26	119.96	SKS	35.3933	56.0214	71.7978	0.4	0.6	0.8	-0.659162	-0.599902	-0.540642	-	no	56.9404	55.6505	-	0.0666667	0.26
PVF	60.5454	25.859	25-Jul-2016	-26.11	-70.65	SKKS	37.4157	43.8495	47.5281	0.9	1	1.1	-1.15977	-1.09002	-1.02027	0.986319	yes	49.8291	-13.4943	-	0.0666667	0.25
PVF	60.5454	25.859	25-Jul-2016	-26.11	-70.65	SKS	NULL	NULL	NULL	NULL	NULL	NULL	-0.0339486	0.00698988	0.0479284	0.986319	yes	57.207	5.07038	-	0.0666667	0.25
PVF	60.5454	25.859	12-Jul-2010	-22.15	-68.2	SKKS	25.2809	46.093	63.7079	0.5	0.8	1.2	-0.897188	-0.791035	-0.684881	0.445197	yes	49.326	-14.6156	-	0.0666667	0.2
PVF	60.5454	25.859	12-Jul-2010	-22.15	-68.2	SKS	NULL	NULL	NULL	NULL	NULL	NULL	-0.239684	-0.143728	-0.047773	0.445197	yes	56.776	3.29024	-	0.0666667	0.2
PVF	60.5454	25.859	20-Jun-2011	-21.7	-68.23	SKKS	21.236	52.3714	69.7753	0.4	0.8	1.4	-0.854617	-0.726881	-0.599145	0.626115	yes	49.3425	-14.8624	-	0.0666667	0.2
PVF	60.5454	25.859	20-Jun-2011	-21.7	-68.23	SKS	NULL	NULL	NULL	NULL	NULL	NULL	0.0269699	0.140056	0.253142	0.626115	yes	56.7904	3.1047	-	0.0666667	0.2
RAF	61.0227	21.7679	21-Jul-2007	-22.15	-65.78	SKKS	NULL	NULL	NULL	NULL	NULL	NULL	-0.0262269	0.0461337	0.118494	-	no	47.6473	-17.2807	-	0.0666667	0.2
RAF	61.0227	21.7679	21-Jul-2007	-22.15	-65.78	SKS	NULL	NULL	NULL	NULL	NULL	NULL	-0.00117552	0.0494673	0.10011	-	no	55.8635	-1.12255	-	0.0666667	0.2
RAF	61.0227	21.7679	04-Mar-2010	-22.23	-68.33	SKKS	NULL	NULL	NULL	NULL	NULL	NULL	-0.0908805	0.00566951	0.10222	-	no	48.3999	-18.0849	-	0.0666667	0.2
RAF	61.0227	21.7679	04-Mar-2010	-22.23	-68.33	SKS	NULL	NULL	NULL	NULL	NULL	NULL	0.0205144	0.102255	0.183995	-	no	56.3924	-1.17967	-	0.0666667	0.2
RAF	61.0227	21.7679	12-Jul-2010	-22.15	-68.2	SKKS	NULL	NULL	NULL	NULL	NULL	NULL	-0.0621012	-0.01603	0.0300411	-	no	48.3634	-18.0796	-	0.0666667	0.2
RAF	61.0227	21.7679	12-Jul-2010	-22.15	-68.2	SKS	NULL	NULL	NULL	NULL	NULL	NULL	-0.0606405	-0.0052083	0.0502239	-	no	56.3607	-1.22417	-	0.0666667	0.2
RAF	61.0227	21.7679	20-Jun-2011	-21.7	-68.23	SKKS	NULL	NULL	NULL	NULL	NULL	NULL	0.124082	0.169481	0.214879	-	no	48.4027	-18.2712	-	0.0666667	0.2
RAF	61.0227	21.7679	20-Jun-2011	-21.7	-68.23	SKS	NULL	NULL	NULL	NULL	NULL	NULL	0.0797804	0.139369	0.198957	-	no	56.3645	-1.42253	-	0.0666667	0.2
RAF	61.0227	21.7679	22-Nov-2011	-15.36	-65.09	SKKS	NULL	NULL	NULL	NULL	NULL	NULL	-0.0185078	0.0402417	0.0989912	-	no	47.7992	-19.795	-	0.0666667	0.26
RAF	61.0227	21.7679	22-Nov-2011	-15.36	-65.09	SKS	NULL	NULL	NULL	NULL	NULL	NULL	0.0942653	0.126895	0.159524	-	no	55.598	-4.15959	-	0.0666667	0.26
RAF	61.0227	21.7679	20-Oct-2015	-14.84	167.31	SKKS	-23.2584	-2.34251	15.1685	0.5	0.6	0.8	-0.704184	-0.668627	-0.63307	0.628199	yes	70.4606	72.3246	-	0.0666667	0.2
RAF	61.0227	21.7679	20-Oct-2015	-14.84	167.31	SKS	NULL	NULL	NULL	NULL	NULL	NULL	-0.00487153	0.0827854	0.170442	0.628199	yes	66.6294	37.1238	-	0.0666667	0.2
RAF	61.0227	21.7679	04-Aug-2016	-22.33	-66	SKKS	NULL	NULL	NULL	NULL	NULL	NULL	0.0158513	0.135234	0.254616	-	no	47.6968	-17.2881	-	0.0666667	0.2
RAF	61.0227	21.7679	04-Aug-2016	-22.33	-66	SKS	NULL	NULL	NULL	NULL	NULL	NULL	-0.335653	-0.168843	-0.00203358	-	no	55.9178	-1.03672	-	0.0666667	0.2
RNF	66.609	26.0135	03-Jun-2008	-10.51	161.27	SKKS	NULL	NULL	NULL	NULL	NULL	NULL	0.0483113	0.109494	0.170676	-	no	70.113	94.841	-	0.0666667	0.2
RNF	66.609	26.0135	03-Jun-2008	-10.51	161.27	SKS	NULL	NULL	NULL	NULL	NULL	NULL	0.0895974	0.196776	0.303954	-	no	71.6289	53.9009	-	0.0666667	0.2
RNF	66.609	26.0135	08-Jul-2008	-15.99	-71.75	SKKS	NULL	NULL	NULL	NULL	NULL	NULL	-0.164459	-0.0867698	-0.00908086	-	no	55.743	-25.2044	-	0.0666667	0.2
RNF	66.609	26.0135	08-Jul-2008	-15.99	-71.75	SKS	NULL	NULL	NULL	NULL	NULL	NULL	0.0614947	0.188057	0.314619	-	no	63.4723	-4.58032	-	0.0666667	0.2
RNF	66.609	26.0135	26-Jun-2010	-10.63	161.45	SKKS	NULL	NULL	NULL	NULL	NULL	NULL	-0.19131	-0.129161	-0.0670116	-	no	70.1744	94.8721	-	0.0666667	0.2
RNF	66.609	26.0135	26-Jun-2010	-10.63	161.45	SKS	NULL	NULL	NULL	NULL	NULL	NULL	0.0751133	0.199045	0.322977	-	no	71.6487	53.7837	-	0.0666667	0.2
RNF	66.609	26.0135	12-Jul-2010	-22.15	-68.2	SKKS	NULL	NULL	NULL	NULL	NULL	NULL	-0.267981	-0.194523	-0.121065	-	no	54.5827	-20.8778	-	0.0666667	0.3
RNF	66.609	26.0135	12-Jul-2010	-22.15	-68.2	SKS	NULL	NULL	NULL	NULL	NULL	NULL	-0.0650083	-0.00472719	0.0555539	-	no	62.8562	-1.05009	-	0.0666667	0.3
RNF	66.609	26.0135	29-Jul-2011	-23.78	179.76	SKKS	69.7753	88.3101	-77.8652	0.6	0.8	1.1	0.71796	0.817832	0.917704	-	no	77.037	88.0444	-	0.0666667	0.2
RNF	66.609	26.0135	29-Jul-2011	-23.78	179.76	SKS	#N/A	-89.6899	#N/A	0	1.1	#N/A	0.725639	0.802519	0.879398	-	no	72.3181	40.0263	-	0.0666667	0.2
RNF	66.609	26.0135	04-Aug-2016	-22.33	-66	SKKS	NULL	NULL	NULL	NULL	NULL	NULL	0.0144428	0.182825	0.351208	-	no	53.9536	-19.8269	-	0.0666667	0.2
RNF	66.609	26.0135	04-Aug-2016	-22.33	-66	SKS	NULL	NULL	NULL	NULL	NULL	NULL	-0.00471224	0.124503	0.253719	-	no	62.4096	-0.840889	-	0.0666667	0.2
RNF	66.609	26.0135	31-Aug-2016	-3.69	152.79	SKKS	NULL	NULL	NULL	NULL	NULL	NULL	-0.187535	-0.139968	-0.0924019	-	no	67.016	95.3367	-	0.0666667	0.2
RNF	66.609	26.0135	31-Aug-2016	-3.69	152.79	SKS	NULL	NULL	NULL	NULL	NULL	NULL	0.104069	0.142778	0.181487	-	no	70.5934	60.7719	-	0.0666667	0.2
RNF	66.609	26.0135	24-Sep-2016	-19.85	-178.27	SKKS	75.8427	84.676	-87.9775	1	1.3	1.6	0.988595	1.08752	1.18645	-	no	78.2878	91.3474	-	0.0666667	0.22
RNF	66.609	26.0135	24-Sep-2016	-19.85	-178.27	SKS	59.6629	66.676	77.8652	1	1.2	1.4	1.16439	1.23457	1.30475	-	no	73.0654	40.2359	-	0.0666667	0.22
RNF	66.609	26.0135	09-May-2017	-14.6	167.38	SKKS	83.9326	-74.5006	-63.7079	0.4	0.6	1	0.464221	0.509409	0.554597	-	no	72.4782	93.7161	-	0.0666667	0.2
RNF	66.609	26.0135	09-May-2017	-14.6	167.38	SKS	61.6854	67.4994	77.8652	0.9	1.3	1.6	0.599719	0.716241	0.832763	-	no	72.1332	49.3038	-	0.0666667	0.2
SA03	70.5034	29.0668	25-Jul-2016	-26.11	-70.65	SKKS	NULL	NULL	NULL	NULL	NULL	NULL	-0.148843	-0.0728063	0.00323069	-	no	59.374	-23.9275	-	0.0666667	0.2
SA03	70.5034	29.0668	25-Jul-2016	-26.11	-70.65	SKS	NULL	NULL	NULL	NULL	NULL	NULL	-0.0369501	0.0446002	0.126151	-	no	67.8044	-0.458055	-	0.0666667	0.2
SA04	70.3191	25.4769	04-Aug-2016	-22.33	-66	SKKS	NULL	NULL	NULL	NULL	NULL	NULL	0.0179549	0.13892	0.259886	-	no	56.7233	-24.8596	-	0.0666667	0.2
SA04	70.3191	25.4769	04-Aug-2016	-22.33	-66	SKS	NULL	NULL	NULL	NULL	NULL	NULL	-0.151345	-0.0406845	0.0699756	-	no	65.8798	-5.14357	-	0.0666667	0.2
SA09	69.4536	30.0391	21-Jul-2014	-19.78	-178.44	SKKS	NULL	NULL	NULL	NULL	NULL	NULL	-0.121262	-0.080204	-0.0391463	-	no	77.701	109.344	-	0.0666667	0.2
SA09	69.4536	30.0391	21-Jul-2014	-19.78	-178.44	SKS	NULL	NULL	NULL	NULL	NULL	NULL	-0.108712	-0.0319232	0.0448653	-	no	75.7638	50.2341	-	0.0666667	0.2
SA09	69.4536	30.0391	01-Nov-2014	-19.7	-177.79	SKKS	NULL	NULL	NULL	NULL	NULL	NULL	-0.159272	-0.0881683	-0.0170646	-	no	77.9181	110.448	-	0.0666667	0.2
SA09	69.4536	30.0391	01-Nov-2014	-19.7	-177.79	SKS	NULL	NULL	NULL	NULL	NULL	NULL	-0.109045	-0.0573622	-0.0056796	-	no	75.8795	50.0707	-	0.0666667	0.2
SA12	68.9731	18.9144	25-Jul-2016	-26.11	-70.65	SKKS	NULL	NULL	NULL	NULL	NULL	NULL	-0.0264848	0.0548497	0.136184	-	no	55.1564	-27.1844	-	0.0666667	0.26
SA12	68.9731	18.9144	25-Jul-2016	-26.11	-70.65	SKS	NULL	NULL	NULL	NULL	NULL	NULL	-0.0627836	-0.0201738	0.0224359	-	no	64.3645	-8.17505	-	0.0666667	0.26
SA13	68.3491	18.8368	01-Nov-2014	-19.7	-177.79	SKKS	39.4382	42.6689	47.5281	1.3	1.5	1.7	0.456319	0.60731	0.758301	-	no	82.4553	96.9045	-	0.0666667	0.22
SA13	68.3491	18.8368	01-Nov-2014	-19.7	-177.79	SKS	31.3483	42.6689	61.6854	0.9	1.6	2.5	0.442428	0.596172	0.749916	-	no	75.741	30.6345	-	0.0666667	0.22
SA19	66.5654	22.1788	01-Nov-2014	-19.7	-177.79	SKKS	43.4831	63.3772	-90	0.48	0.82	1.32	0.810119	0.905793	1.00147	-	no	80.1837	87.3405	-	0.0666667	0.2
SA19	66.5654	22.1788	01-Nov-2014	-19.7	-177.79	SKS	49.5506	63.3772	81.9101	0.98	1.4	1.86	1.5766	1.76296	1.94933	-	no	73.466	34.299	-	0.0666667	0.2
SA19	66.5654	22.1788	07-May-2015	-7.23	154.55	SKKS	-3.03371	20.4516	37.4157	0.68	1.12	1.8	-0.882181	-0.795149	-0.708117	0.606957	yes	69.0117	92.125	-	0.0666667	0.2
SA19	66.5654	22.1788	07-May-2015	-7.23	154.55	SKS	NULL	NULL	NULL	NULL	NULL	NULL	-0.10116	-0.0239092	0.0533412	0.606957	yes	71.4111	53.2247	-	0.0666667	0.2
SA19	66.5654	22.1788	31-Aug-2016	-3.69	152.79	SKKS	NULL	NULL	NULL	NULL	NULL	NULL	0.0608993	0.0919279	0.122956	-	no	68.5512	93.0263	-	0.0666667	0.26
SA19	66.5654	22.1788	31-Aug-2016	-3.69	152.79	SKS	NULL	NULL	NULL	NULL	NULL	NULL	-0.233099	-0.143525	-0.0539499	-	no	71.3853	55.7129	-	0.0666667	0.26
SA21	66.0406	25.0304	31-Aug-2016	-3.69	152.79	SKKS	-19.2135	1.9931	27.3034	0.46	0.7	1.14	-0.639634	-0.549039	-0.458445	-	no	67.1842	93.2783	3.4	0.0666667	0.2
SA21	66.0406	25.0304	31-Aug-2016	-3.69	152.79	SKS	-15.1685	9.9931	35.3933	0.44	0.64	0.98	-0.755178	-0.680928	-0.606678	-	no	70.3001	58.297	3.4	0.0666667	0.2
SA23	65.9262	20.3008	31-Aug-2016	-3.69	152.79	SKKS	NULL	NULL	NULL	NULL	NULL	NULL	0.0502328	0.122771	0.19531	-	no	69.0787	90.0642	-	0.0666667	0.2
SA23	65.9262	20.3008	31-Aug-2016	-3.69	152.79	SKS	NULL	NULL	NULL	NULL	NULL	NULL	-0.156617	-0.0825309	-0.00844436	-	no	71.1785	51.7884	-	0.0666667	0.2
SA25	65.6723	14.2249	31-Aug-2016	-3.69	152.79	SKKS	NULL	NULL	NULL	NULL	NULL	NULL	-0.219009	-0.176634	-0.134258	-	no	71.5216	85.4369	-	0.0666667	0.2
SA25	65.6723	14.2249	31-Aug-2016	-3.69	152.79	SKS	NULL	NULL	NULL	NULL	NULL	NULL	-0.119256	-0.0336966	0.0518632	-	no	72.0991	42.8801	-	0.0666667	0.2
SA29	65.2879	19.8452	31-Aug-2016	-3.69	152.79	SKKS	NULL	NULL	NULL	NULL	NULL	NULL	-0.116661	-0.0414332	0.0337943	-	no	69.0217	87.8188	-	0.0666667	0.2
SA29	65.2879	19.8452	31-Aug-2016	-3.69	152.79	SKS	NULL	NULL	NULL	NULL	NULL	NULL	0.059411	0.140313	0.221214	-	no	70.6708	50.0337	-	0.0666667	0.2
SA30	65.0923	21.4977	20-Oct-2015	-14.84	167.31	SKS	61.6854	73.3414	87.9775	0.6	0.8	1.06	0.753096	0.817231	0.881366	0.766614	yes	71.1001	40.6811	-	0.0666667	0.2
SA30	65.0923	21.4977	20-Oct-2015	-14.84	167.31	SKKS	NULL	NULL	NULL	NULL	NULL	NULL	-0.146278	-0.079898	-0.0135183	0.766614	yes	73.5114	84.818	-	0.0666667	0.2
SA31	64.9911	18.501	31-Aug-2016	-3.69	152.79	SKKS	NULL	NULL	NULL	NULL	NULL	NULL	-0.229213	-0.166193	-0.103174	-	no	69.4469	86.0915	-	0.0666667	0.2
SA31	64.9911	18.501	31-Aug-2016	-3.69	152.79	SKS	NULL	NULL	NULL	NULL	NULL	NULL	0.0073254	0.0870823	0.166839	-	no	70.644	47.636	-	0.0666667	0.2
SA32	64.9876	13.5813	31-Aug-2016	-3.69	152.79	SKKS	NULL	NULL	NULL	NULL	NULL	NULL	-0.0392206	0.0225983	0.0844172	-	no	71.5218	82.6954	-	0.0666667	0.2
SA32	64.9876	13.5813	31-Aug-2016	-3.69	152.79	SKS	NULL	NULL	NULL	NULL	NULL	NULL	-0.156613	-0.0410711	0.0744709	-	no	71.5339	40.6851	-	0.0666667	0.2
SA36	64.4402	24.5172	04-Aug-2016	-22.33	-66	SKKS	NULL	NULL	NULL	NULL	NULL	NULL	-0.218947	0.0685443	0.356036	-	no	51.62	-18.4611	-88	0.0666667	0.2
SA36	64.4402	24.5172	04-Aug-2016	-22.33	-66	SKS	NULL	NULL	NULL	NULL	NULL	NULL	0.0438618	0.131327	0.218793	-	no	59.9521	-0.514764	-88	0.0666667	0.2
SA36	64.4402	24.5172	31-Aug-2016	-3.69	152.79	SKKS	-21.236	17.9285	43.4831	0.38	0.7	1.5	-0.528883	-0.443457	-0.358031	0.464019	yes	66.6713	88.839	-88	0.0666667	0.2
SA36	64.4402	24.5172	31-Aug-2016	-3.69	152.79	SKS	NULL	NULL	NULL	NULL	NULL	NULL	0.105988	0.14164	0.177291	0.464019	yes	68.9331	54.7896	-88	0.0666667	0.2
SA39	64.0718	14.0906	31-Aug-2016	-3.69	152.79	SKKS	NULL	NULL	NULL	NULL	NULL	NULL	-0.268225	-0.199474	-0.130724	-	no	70.889	80.0962	-	0.0666667	0.2
SA39	64.0718	14.0906	31-Aug-2016	-3.69	152.79	SKS	NULL	NULL	NULL	NULL	NULL	NULL	-0.0613626	0.0555391	0.172441	-	no	70.5122	39.7671	-	0.0666667	0.2
SA44	63.7052	12.3484	31-Aug-2016	-3.69	152.79	SKKS	NULL	NULL	NULL	NULL	NULL	NULL	0.0643793	0.127507	0.190634	-	no	71.4609	77.4865	-10	0.0666667	0.2
SA44	63.7052	12.3484	31-Aug-2016	-3.69	152.79	SKS	NULL	NULL	NULL	NULL	NULL	NULL	-0.304399	-0.143927	0.016546	-	no	70.4365	36.7784	-10	0.0666667	0.24
SA46	63.4896	18.0945	23-Aug-2016	-7.28	122.45	SKKS	NULL	NULL	NULL	NULL	NULL	NULL	-0.193255	-0.0942483	0.00475808	-	no	56.3978	71.343	-	0.0666667	0.24
SA46	63.4896	18.0945	23-Aug-2016	-7.28	122.45	SKS	NULL	NULL	NULL	NULL	NULL	NULL	0.117382	0.186925	0.256468	-	no	62.3347	49.6746	-	0.0666667	0.2
SA49	63.1749	21.2788	31-Aug-2016	-3.69	152.79	SKKS	-19.2135	-8.90525	3.03371	0.76	1.02	1.32	-0.740904	-0.639496	-0.538089	0.42184	yes	67.368	83.2283	-4.2	0.0666667	0.2
SA49	63.1749	21.2788	31-Aug-2016	-3.69	152.79	SKS	NULL	NULL	NULL	NULL	NULL	NULL	-0.116249	-0.0116248	0.0929989	0.42184	yes	68.3483	48.4361	-4.2	0.0666667	0.22
SA56	62.4859	16.3087	25-Jul-2016	-26.11	-70.65	SKKS	NULL	NULL	NULL	NULL	NULL	NULL	0.0369605	0.0774468	0.117933	-	no	48.6259	-22.1268	-	0.0666667	0.22
SA56	62.4859	16.3087	25-Jul-2016	-26.11	-70.65	SKS	NULL	NULL	NULL	NULL	NULL	NULL	-0.0824037	-0.0296794	0.0230448	-	no	57.2815	-5.75488	-	0.0666667	0.2
SA56	62.4859	16.3087	31-Aug-2016	-3.69	152.79	SKKS	NULL	NULL	NULL	NULL	NULL	NULL	-0.253778	-0.169351	-0.084923	-	no	69.0936	77.2503	-	0.0666667	0.2
SA56	62.4859	16.3087	31-Aug-2016	-3.69	152.79	SKS	NULL	NULL	NULL	NULL	NULL	NULL	-0.16072	-0.0449439	0.0708327	-	no	68.5289	40.5629	-	0.0666667	0.2
SA60	61.693	17.3793	25-Jul-2016	-26.11	-70.65	SKKS	NULL	NULL	NULL	NULL	NULL	NULL	0.0761116	0.129201	0.182291	-	no	48.2074	-20.7325	-	0.0666667	0.2
SA60	61.693	17.3793	25-Jul-2016	-26.11	-70.65	SKS	NULL	NULL	NULL	NULL	NULL	NULL	-0.178421	-0.0676091	0.0432027	-	no	56.7033	-4.20567	-	0.0666667	0.2
SA60	61.693	17.3793	23-Aug-2016	-7.28	122.45	SKKS	NULL	NULL	NULL	NULL	NULL	NULL	-0.252905	-0.139961	-0.0270173	-	no	55.4461	68.477	-	0.0666667	0.2
SA60	61.693	17.3793	23-Aug-2016	-7.28	122.45	SKS	NULL	NULL	NULL	NULL	NULL	NULL	0.0339956	0.0793748	0.124754	-	no	60.8954	46.9456	-	0.0666667	0.2
SA60	61.693	17.3793	31-Aug-2016	-3.69	152.79	SKS	67.7528	77.6498	-92.0225	0.9	1.28	1.68	0.682156	0.860146	1.03814	0.450418	yes	67.5427	41.022	-	0.0666667	0.2
SA60	61.693	17.3793	31-Aug-2016	-3.69	152.79	SKKS	NULL	NULL	NULL	NULL	NULL	NULL	0.113376	0.172557	0.231738	0.450418	yes	68.1594	76.1118	-	0.0666667	0.2
SA61	61.5934	21.4622	25-Jul-2016	-26.11	-70.65	SKKS	NULL	NULL	NULL	NULL	NULL	NULL	-0.194007	-0.129701	-0.0653946	-	no	49.3773	-17.7446	1.9	0.0666667	0.2
SA61	61.5934	21.4622	25-Jul-2016	-26.11	-70.65	SKS	NULL	NULL	NULL	NULL	NULL	NULL	0.0843217	0.159933	0.235545	-	no	57.4281	-0.0482594	1.9	0.0666667	0.2
SA61	61.5934	21.4622	31-Aug-2016	-3.69	152.79	SKKS	NULL	NULL	NULL	NULL	NULL	NULL	-0.0343329	0.0299519	0.0942367	-	no	66.36	79.5593	1.9	0.0666667	0.2
SA61	61.5934	21.4622	31-Aug-2016	-3.69	152.79	SKS	NULL	NULL	NULL	NULL	NULL	NULL	0.127358	0.194688	0.262018	-	no	66.7444	46.4962	1.9	0.0666667	0.2
SA63	61.134	13.9566	25-Jul-2016	-26.11	-70.65	SKKS	NULL	NULL	NULL	NULL	NULL	NULL	-0.12833	-0.0802703	-0.032211	-	no	46.6067	-22.7497	-	0.0666667	0.26
SA63	61.134	13.9566	25-Jul-2016	-26.11	-70.65	SKS	NULL	NULL	NULL	NULL	NULL	NULL	-0.0326886	0.0241918	0.0810721	-	no	55.4025	-7.31503	-	0.0666667	0.26
SA63	61.134	13.9566	23-Aug-2016	-7.28	122.45	SKKS	NULL	NULL	NULL	NULL	NULL	NULL	-0.132253	0.010783	0.153819	-	no	56.3788	65.1895	-	0.0666667	0.24
SA63	61.134	13.9566	23-Aug-2016	-7.28	122.45	SKS	NULL	NULL	NULL	NULL	NULL	NULL	-0.26141	-0.174453	-0.0874961	-	no	61.21	42.418	-	0.0666667	0.24
SA64	61.0537	25.0399	20-Oct-2015	-14.84	167.31	SKKS	NULL	NULL	NULL	NULL	NULL	NULL	-0.119994	-0.0526649	0.0146639	-	no	69.0899	76.0515	0.3	0.0666667	0.2
SA64	61.0537	25.0399	20-Oct-2015	-14.84	167.31	SKS	NULL	NULL	NULL	NULL	NULL	NULL	-0.141954	-0.0706174	0.000719531	-	no	66.2549	41.4916	0.3	0.0666667	0.2
SA64	61.0537	25.0399	25-Jul-2016	-26.11	-70.65	SKKS	13.1461	25.4023	39.4382	0.72	1	1.32	-0.863828	-0.742702	-0.621576	0.653382	yes	50.036	-14.5896	0.3	0.0666667	0.22
SA64	61.0537	25.0399	25-Jul-2016	-26.11	-70.65	SKS	NULL	NULL	NULL	NULL	NULL	NULL	0.0318055	0.0665359	0.101266	0.653382	yes	57.5749	3.93162	0.3	0.0666667	0.22
SA65	61.0535	15.7698	04-Aug-2016	-22.33	-66	SKKS	NULL	NULL	NULL	NULL	NULL	NULL	-0.0349403	0.0447597	0.12446	-	no	45.8196	-21.5037	-	0.0906667	0.2
SA65	61.0535	15.7698	04-Aug-2016	-22.33	-66	SKS	NULL	NULL	NULL	NULL	NULL	NULL	0.102907	0.166912	0.230917	-	no	54.5499	-7.03254	-	0.0666667	0.2
SA65	61.0535	15.7698	31-Aug-2016	-3.69	152.79	SKS	75.8427	-87.7737	-69.7753	0.62	0.92	1.22	0.922035	1.01407	1.1061	0.979239	yes	67.1378	37.9888	-	0.0666667	0.2
SA65	61.0535	15.7698	31-Aug-2016	-3.69	152.79	SKKS	NULL	NULL	NULL	NULL	NULL	NULL	-0.268097	-0.16265	-0.057204	0.979239	yes	68.4424	72.929	-	0.0666667	0.2
SA67	60.4158	22.4439	25-Jul-2016	-26.11	-70.65	SKS	-71.7978	-57.0517	-45.5056	0.62	0.8	0.98	0.748796	0.798672	0.848548	0.565287	yes	56.3998	1.58349	-0.3	0.0666667	0.2
SA67	60.4158	22.4439	25-Jul-2016	-26.11	-70.65	SKKS	NULL	NULL	NULL	NULL	NULL	NULL	0.00101041	0.0922598	0.183509	0.565287	yes	48.5909	-15.9882	-0.3	0.0666667	0.2
SGF	67.4421	26.5261	25-Aug-2006	-24.41	-67.03	SKKS	NULL	NULL	NULL	NULL	NULL	NULL	-0.244019	-0.195208	-0.146397	-	no	55.0904	-20.0567	-	0.0666667	0.24
SGF	67.4421	26.5261	25-Aug-2006	-24.41	-67.03	SKS	NULL	NULL	NULL	NULL	NULL	NULL	-0.0229096	0.031825	0.0865596	-	no	63.6002	-0.133749	-	0.0666667	0.24
SGF	67.4421	26.5261	21-Jul-2007	-22.15	-65.78	SKKS	NULL	NULL	NULL	NULL	NULL	NULL	-0.231453	-0.156091	-0.0807295	-	no	54.7348	-20.4904	-	0.0666667	0.18
SGF	67.4421	26.5261	21-Jul-2007	-22.15	-65.78	SKS	NULL	NULL	NULL	NULL	NULL	NULL	0.123592	0.182742	0.241892	-	no	63.2831	-1.1862	-	0.0666667	0.18
SGF	67.4421	26.5261	12-Jul-2010	-22.15	-68.2	SKKS	NULL	NULL	NULL	NULL	NULL	NULL	-0.245182	-0.17906	-0.112939	-	no	55.4031	-21.6348	-	0.0666667	0.24
SGF	67.4421	26.5261	12-Jul-2010	-22.15	-68.2	SKS	NULL	NULL	NULL	NULL	NULL	NULL	-0.206756	-0.139791	-0.0728256	-	no	63.7645	-1.3922	-	0.0666667	0.24
SGF	67.4421	26.5261	28-Apr-2012	-18.68	-174.71	SKKS	51.573	78.3558	-81.9101	0.5	0.8	1.3	0.154584	0.300621	0.446658	-	no	80.1186	99.1126	-	0.0666667	0.22
SGF	67.4421	26.5261	28-Apr-2012	-18.68	-174.71	SKS	59.6629	76.3558	-90	0.7	1	1.4	0.639876	0.740463	0.84105	-	no	74.535	40.5991	-	0.0666667	0.22
SGF	67.4421	26.5261	21-Dec-2012	-14.34	167.29	SKKS	NULL	NULL	NULL	NULL	NULL	NULL	0.0856641	0.187818	0.289972	-	no	72.6142	97.3319	-	0.0666667	0.2
SGF	67.4421	26.5261	21-Dec-2012	-14.34	167.29	SKS	NULL	NULL	NULL	NULL	NULL	NULL	0.0166599	0.128074	0.239488	-	no	72.9233	51.4572	-	0.0666667	0.2
SGF	67.4421	26.5261	20-Oct-2015	-14.84	167.31	SKKS	NULL	NULL	NULL	NULL	NULL	NULL	-0.0678953	-0.022745	0.0224054	-	no	72.6017	96.9455	-	0.0666667	0.2
SGF	67.4421	26.5261	20-Oct-2015	-14.84	167.31	SKS	NULL	NULL	NULL	NULL	NULL	NULL	0.102617	0.152603	0.202588	-	no	72.8746	51.2605	-	0.0666667	0.2
SGF	67.4421	26.5261	31-Aug-2016	-3.69	152.79	SKKS	-11.1236	13.1055	37.4157	0.5	0.7	1.1	-0.676558	-0.617735	-0.558911	0.34176	yes	67.116	97.8155	-	0.0666667	0.2
SGF	67.4421	26.5261	31-Aug-2016	-3.69	152.79	SKS	NULL	NULL	NULL	NULL	NULL	NULL	-0.217151	-0.171512	-0.125874	0.34176	yes	71.2018	63.2093	-	0.0666667	0.2
SKAR	60.68	8.304	06-Apr-2013	-3.52	138.48	SKKS	NULL	NULL	NULL	NULL	NULL	NULL	-0.325181	-0.184915	-0.044649	-	no	65.2428	64.8693	-	0.0666667	0.2
SKAR	60.68	8.304	06-Apr-2013	-3.52	138.48	SKS	NULL	NULL	NULL	NULL	NULL	NULL	0.0504516	0.172953	0.295454	-	no	65.683	33.0888	-	0.0666667	0.24
SLIT	57.6287	22.2905	24-May-2010	-8.08	-71.56	SKKS	NULL	NULL	NULL	NULL	NULL	NULL	-0.175569	-0.0849382	0.00569261	-	no	48.1156	-21.4299	-	0.0666667	0.24
SLIT	57.6287	22.2905	24-May-2010	-8.08	-71.56	SKS	NULL	NULL	NULL	NULL	NULL	NULL	-0.115876	-0.0655085	-0.0151414	-	no	54.2065	-4.88492	-	0.0666667	0.2
SLIT	57.6287	22.2905	21-Sep-2013	-7.26	119.96	SKKS	NULL	NULL	NULL	NULL	NULL	NULL	-0.0740999	0.00740379	0.0889074	-	no	49.6114	67.2528	-	0.0666667	0.2
SLIT	57.6287	22.2905	21-Sep-2013	-7.26	119.96	SKS	NULL	NULL	NULL	NULL	NULL	NULL	0.0835552	0.122174	0.160792	-	no	55.2523	49.4704	-	0.0666667	0.2
SLIT	57.6287	22.2905	31-Aug-2016	-3.69	152.79	SKS	87.9775	-82.056	-75.8427	0.9	1.2	1.4	0.836094	0.919574	1.00305	0.649826	yes	62.5463	43.2564	-	0.0666667	0.2
SLIT	57.6287	22.2905	31-Aug-2016	-3.69	152.79	SKKS	NULL	NULL	NULL	NULL	NULL	NULL	0.0823153	0.134292	0.186269	0.649826	yes	63.2262	72.1725	-	0.0666667	0.2
SOLU	63.247	17.258	05-Jun-2016	-4.58	125.62	SKKS	-67.7528	-56.488	-49.5506	0.98	1.22	1.48	1.08132	1.20324	1.32517	-	no	57.8894	72.8966	-	0.0666667	0.2
SOLU	63.247	17.258	05-Jun-2016	-4.58	125.62	SKS	-79.8876	-64.488	-53.5955	0.94	1.3	1.68	1.09614	1.25642	1.4167	-	no	63.2111	49.8414	-	0.0666667	0.2
STAV	58.935	5.702	31-Aug-2016	-3.69	152.79	SKKS	-25.2809	-11.6118	-1.01124	1.24	1.58	1.98	-1.28009	-1.13827	-0.996455	-	no	71.2248	55.8551	-	0.0666667	0.2
STAV	58.935	5.702	31-Aug-2016	-3.69	152.79	SKS	-39.4382	-21.6118	9.10112	0.56	0.94	1.66	-0.82187	-0.741537	-0.661204	-	no	66.1975	21.614	-	0.0666667	0.2
STEI	67.93	15.242	21-Jul-2014	-19.78	-178.44	SKKS	NULL	NULL	NULL	NULL	NULL	NULL	0.0109429	0.0570131	0.103083	-	no	83.6295	88.6552	18	0.0666667	0.2
STEI	67.93	15.242	21-Jul-2014	-19.78	-178.44	SKS	NULL	NULL	NULL	NULL	NULL	NULL	0.0846623	0.173176	0.26169	-	no	75.4073	24.6516	18	0.0666667	0.2
STEI	67.93	15.242	01-Nov-2014	-19.7	-177.79	SKKS	NULL	NULL	NULL	NULL	NULL	NULL	0.0740251	0.120551	0.167077	-	no	83.9259	89.7149	18	0.0666667	0.2
STEI	67.93	15.242	01-Nov-2014	-19.7	-177.79	SKS	NULL	NULL	NULL	NULL	NULL	NULL	-0.0318829	-0.00248939	0.0269041	-	no	75.4805	24.2866	18	0.0666667	0.2
STEI	67.93	15.242	24-Sep-2016	-19.85	-178.27	SKKS	NULL	NULL	NULL	NULL	NULL	NULL	0.0241179	0.0926081	0.161098	-	no	83.7014	88.6182	18	0.0666667	0.2
STEI	67.93	15.242	24-Sep-2016	-19.85	-178.27	SKS	NULL	NULL	NULL	NULL	NULL	NULL	0.0582464	0.108791	0.159335	-	no	75.415	24.5435	18	0.0666667	0.2
STEI	67.93	15.242	09-May-2017	-14.6	167.38	SKKS	NULL	NULL	NULL	NULL	NULL	NULL	-0.188764	-0.160471	-0.132178	-	no	77.5753	92.9621	18	0.0666667	0.2
STEI	67.93	15.242	09-May-2017	-14.6	167.38	SKS	NULL	NULL	NULL	NULL	NULL	NULL	-0.0899815	-0.0310067	0.027968	-	no	75.0192	35.5133	18	0.0666667	0.2
STEI	67.93	15.242	17-Jun-2017	-24.1	179.59	SKKS	NULL	NULL	NULL	NULL	NULL	NULL	-0.233496	-0.152745	-0.0719946	-	no	82.455	83.4574	18	0.0666667	0.2
STEI	67.93	15.242	17-Jun-2017	-24.1	179.59	SKS	NULL	NULL	NULL	NULL	NULL	NULL	-0.0343294	-0.00067525	0.0329789	-	no	74.6138	24.9327	18	0.0666667	0.26
SUE	61.057	4.761	31-Aug-2016	-3.69	152.79	SKKS	-33.3708	-13.3304	7.07865	0.52	0.74	1.04	-0.62709	-0.480651	-0.334213	0.0348107	yes	73.2005	61.0662	-	0.0666667	0.26
SUE	61.057	4.761	31-Aug-2016	-3.69	152.79	SKS	NULL	NULL	NULL	NULL	NULL	NULL	-0.299403	-0.188505	-0.0776063	0.0348107	yes	68.6515	22.2422	-	0.0666667	0.2
SUF	62.7191	26.1506	21-Jul-2007	-22.15	-65.78	SKKS	21.236	47.0924	63.7079	0.5	0.8	1.2	-0.929343	-0.837919	-0.746495	0.510939	yes	50.6143	-15.6331	-	0.0666667	0.2
SUF	62.7191	26.1506	21-Jul-2007	-22.15	-65.78	SKS	NULL	NULL	NULL	NULL	NULL	NULL	-0.235556	-0.0489915	0.137573	0.510939	yes	58.5393	2.25677	-	0.0666667	0.2
SUF	62.7191	26.1506	08-Jul-2008	-15.99	-71.75	SKKS	NULL	NULL	NULL	NULL	NULL	NULL	-0.1405	-0.0792327	-0.0179654	-	no	52.8288	-20.4004	-	0.0666667	0.2
SUF	62.7191	26.1506	08-Jul-2008	-15.99	-71.75	SKS	NULL	NULL	NULL	NULL	NULL	NULL	-0.122226	-0.059597	0.00303249	-	no	59.8368	-0.709717	-	0.0666667	0.2
SUF	62.7191	26.1506	12-Jul-2010	-22.15	-68.2	SKKS	19.2135	31.1851	47.5281	0.5	0.7	0.8	-0.839529	-0.786569	-0.73361	0.802087	yes	51.3517	-16.462	-	0.0666667	0.2
SUF	62.7191	26.1506	12-Jul-2010	-22.15	-68.2	SKS	NULL	NULL	NULL	NULL	NULL	NULL	0.0684768	0.174387	0.280298	0.802087	yes	59.0273	2.19052	-	0.0666667	0.2
SUF	62.7191	26.1506	02-Aug-2012	-8.41	-74.26	SKKS	NULL	NULL	NULL	NULL	NULL	NULL	-0.0523874	0.106467	0.265321	-	no	54.1653	-24.6643	-	0.0666667	0.2
SUF	62.7191	26.1506	02-Aug-2012	-8.41	-74.26	SKS	NULL	NULL	NULL	NULL	NULL	NULL	-0.107117	0.00324831	0.113613	-	no	60.521	-4.78981	-	0.0666667	0.2
SVAU	64.494	19.575	20-Oct-2015	-14.84	167.31	SKKS	NULL	NULL	NULL	NULL	NULL	NULL	-0.227235	-0.160175	-0.0931157	-	no	73.9846	80.8069	-	0.0666667	0.2
SVAU	64.494	19.575	20-Oct-2015	-14.84	167.31	SKS	NULL	NULL	NULL	NULL	NULL	NULL	-0.0190211	0.106186	0.231394	-	no	70.7008	37.2872	-	0.0666667	0.26
SVAU	64.494	19.575	04-Aug-2016	-22.33	-66	SKKS	NULL	NULL	NULL	NULL	NULL	NULL	-0.0912326	0.0418611	0.174955	-	no	50.101	-21.714	-	0.0666667	0.26
SVAU	64.494	19.575	04-Aug-2016	-22.33	-66	SKS	NULL	NULL	NULL	NULL	NULL	NULL	-0.105403	0.0356906	0.176784	-	no	58.918	-5.34561	-	0.0666667	0.26
SVAU	64.494	19.575	31-Aug-2016	-3.69	152.79	SKKS	-13.1461	2.99663	23.2584	0.7	0.9	1.18	-0.909074	-0.848988	-0.788902	0.598985	yes	68.768	85.4161	-	0.0666667	0.26
SVAU	64.494	19.575	31-Aug-2016	-3.69	152.79	SKS	NULL	NULL	NULL	NULL	NULL	NULL	-0.189917	-0.124812	-0.0597062	0.598985	yes	69.9582	48.2365	-	0.0666667	0.2
TOF	66.08	24.33	21-Jul-2014	-19.78	-178.44	SKKS	47.5281	61.0407	77.8652	0.5	0.6	0.9	0.48244	0.530309	0.578177	-	no	78.6479	86.7155	-	0.0666667	0.2
TOF	66.08	24.33	21-Jul-2014	-19.78	-178.44	SKS	51.573	59.0407	69.7753	0.9	1.1	1.4	0.949791	1.01605	1.0823	-	no	72.6346	37.3576	-	0.0666667	0.2
TOF	66.08	24.33	07-May-2015	-7.23	154.55	SKKS	-7.07865	10.7906	29.3258	0.8	1.1	1.4	-1.20449	-1.03663	-0.868772	0.929729	yes	67.9336	91.985	-	0.0666667	0.2
TOF	66.08	24.33	07-May-2015	-7.23	154.55	SKS	NULL	NULL	NULL	NULL	NULL	NULL	0.0609571	0.178909	0.296861	0.929729	yes	70.5218	55.0695	-	0.0666667	0.2
TOF	66.08	24.33	23-Aug-2016	-7.28	122.45	SKKS	19.2135	29.5342	43.4831	0.7	1	1.3	-1.32505	-1.1277	-0.930352	-	no	55.7478	78.7448	-	0.0666667	0.2
TOF	66.08	24.33	23-Aug-2016	-7.28	122.45	SKS	15.1685	27.5342	41.4607	0.7	1.1	1.4	-1.33368	-1.18147	-1.02925	-	no	62.9267	59.3726	-	0.0666667	0.2
TOF	66.08	24.33	15-Apr-2017	-23.24	-67.65	SKKS	NULL	NULL	NULL	NULL	NULL	NULL	-0.337815	-0.145685	0.0464444	-	no	53.4392	-20.5775	-	0.0666667	0.22
TOF	66.08	24.33	15-Apr-2017	-23.24	-67.65	SKS	NULL	NULL	NULL	NULL	NULL	NULL	-0.122216	0.0106354	0.143487	-	no	61.9017	-1.63353	-	0.0666667	0.22
TOF	66.08	24.33	09-May-2017	-14.6	167.38	SKS	71.7978	83.8884	-87.9775	0.7	0.9	1.2	0.862165	0.939223	1.01628	0.650092	yes	71.8272	46.1655	-	0.0666667	0.2
TOF	66.08	24.33	09-May-2017	-14.6	167.38	SKKS	NULL	NULL	NULL	NULL	NULL	NULL	0.0977641	0.154918	0.212072	0.650092	yes	72.9094	90.7101	-	0.0666667	0.2
TRO	69.6345	18.9077	13-Jul-2009	-9.13	119.32	SKKS	11.1236	17.4169	27.3034	0.96	1.28	1.6	-1.0104	-0.924389	-0.838381	-	no	58.4548	79.0441	-	0.0666667	0.2
TRO	69.6345	18.9077	13-Jul-2009	-9.13	119.32	SKS	11.1236	19.4169	31.3483	1	1.44	1.84	-1.18426	-1.03501	-0.885765	-	no	66.4353	58.2833	-	0.0666667	0.2
UDD	60.09	13.607	20-Oct-2015	-14.84	167.31	SKKS	NULL	NULL	NULL	NULL	NULL	NULL	-0.0516422	0.00672426	0.0650907	-	no	73.134	58.9331	-	0.0666667	0.2
UDD	60.09	13.607	20-Oct-2015	-14.84	167.31	SKS	NULL	NULL	NULL	NULL	NULL	NULL	-0.104692	-0.0317501	0.0411917	-	no	66.4041	25.1939	-	0.0666667	0.2
UDD	60.09	13.607	31-Aug-2016	-3.69	152.79	SKKS	-9.10112	0.336329	11.1236	0.74	0.86	0.98	-0.92188	-0.871063	-0.820247	0.576074	yes	68.7189	68.171	-	0.0666667	0.24
UDD	60.09	13.607	31-Aug-2016	-3.69	152.79	SKS	NULL	NULL	NULL	NULL	NULL	NULL	-0.244173	-0.17586	-0.107548	0.576074	yes	66.4518	33.9135	-	0.0666667	0.24
UMAU	63.8829	20.6779	21-Sep-2013	-7.26	119.96	SKKS	NULL	NULL	NULL	NULL	NULL	NULL	-0.0536061	-0.0176003	0.0184055	-	no	54.755	72.7365	-	0.0666667	0.2
UMAU	63.8829	20.6779	21-Sep-2013	-7.26	119.96	SKS	NULL	NULL	NULL	NULL	NULL	NULL	0.0989174	0.136128	0.173338	-	no	61.3576	53.124	-	0.0666667	0.2
UMAU	63.8829	20.6779	20-Oct-2015	-14.84	167.31	SKKS	NULL	NULL	NULL	NULL	NULL	NULL	-0.00914186	0.0414548	0.0920515	-	no	73.102	79.7607	-	0.0666667	0.24
UMAU	63.8829	20.6779	20-Oct-2015	-14.84	167.31	SKS	NULL	NULL	NULL	NULL	NULL	NULL	-0.0177361	0.0200345	0.0578051	-	no	69.9002	38.2044	-	0.0666667	0.24
VAF	63.0422	22.6715	14-Nov-2009	-22.97	-66.64	SKKS	NULL	NULL	NULL	NULL	NULL	NULL	0.0301504	0.115747	0.201344	-	no	49.9839	-18.3014	-	0.0666667	0.2
VAF	63.0422	22.6715	14-Nov-2009	-22.97	-66.64	SKS	NULL	NULL	NULL	NULL	NULL	NULL	0.0798913	0.120385	0.160878	-	no	58.3113	-1.05884	-	0.0666667	0.2
VANU	58.4921	12.0727	31-Aug-2016	-3.69	152.79	SKKS	-25.2809	-16.6844	-11.1236	1.32	1.64	2	-1.25898	-0.981467	-0.703955	0.66008	yes	68.1815	62.6855	-	0.0666667	0.2
VANU	58.4921	12.0727	31-Aug-2016	-3.69	152.79	SKS	NULL	NULL	NULL	NULL	NULL	NULL	-0.0438757	0.0247052	0.0932861	0.66008	yes	64.9498	30.2188	-	0.0666667	0.2
VJF	60.5388	27.555	21-Jul-2014	-19.78	-178.44	SKKS	NULL	NULL	NULL	NULL	NULL	NULL	-0.177588	-0.135556	-0.0935241	-	no	72.7297	70.9263	-	0.0666667	0.2
VJF	60.5388	27.555	21-Jul-2014	-19.78	-178.44	SKS	NULL	NULL	NULL	NULL	NULL	NULL	-0.00264571	0.0229634	0.0485725	-	no	66.1056	38.1609	-	0.0666667	0.2
VJF	60.5388	27.555	31-Aug-2016	-3.69	152.79	SKKS	NULL	NULL	NULL	NULL	NULL	NULL	-0.188778	-0.11327	-0.0377618	-	no	63.1337	82.6302	-	0.0666667	0.2
VJF	60.5388	27.555	31-Aug-2016	-3.69	152.79	SKS	NULL	NULL	NULL	NULL	NULL	NULL	0.0158406	0.083222	0.150603	-	no	64.5697	53.2432	-	0.0666667	0.2
VRF	67.748	29.609	14-Apr-2008	-56.02	-28.03	SKKS	NULL	NULL	NULL	NULL	NULL	NULL	-0.248591	-0.177404	-0.106218	-	no	48.9499	9.34897	-	0.0666667	0.2
VRF	67.748	29.609	14-Apr-2008	-56.02	-28.03	SKS	NULL	NULL	NULL	NULL	NULL	NULL	-0.0366114	0.0358296	0.108271	-	no	60.9456	19.0963	-	0.0666667	0.2
VRF	67.748	29.609	30-Aug-2008	-6.15	147.26	SKKS	9.10112	16.3063	27.3034	1.2	1.4	1.7	-1.73766	-1.63395	-1.53025	-	no	63.7269	96.4807	-	0.0666667	0.2
VRF	67.748	29.609	30-Aug-2008	-6.15	147.26	SKS	5.05618	22.3063	41.4607	0.7	1	1.4	-0.842846	-0.744124	-0.645401	-	no	69.2708	67.3225	-	0.0666667	0.2
VRF	67.748	29.609	10-Aug-2009	-11.61	166.09	SKKS	NULL	NULL	NULL	NULL	NULL	NULL	-0.216009	-0.173666	-0.131322	-	no	71.0432	101.891	-	0.0666667	0.26
VRF	67.748	29.609	10-Aug-2009	-11.61	166.09	SKS	NULL	NULL	NULL	NULL	NULL	NULL	0.0732569	0.153641	0.234024	-	no	72.8523	58.6196	-	0.0666667	0.26
VRF	67.748	29.609	20-Jun-2011	-21.7	-68.23	SKKS	NULL	NULL	NULL	NULL	NULL	NULL	-0.204953	-0.135521	-0.0660898	-	no	56.646	-20.4461	-	0.0666667	0.24
VRF	67.748	29.609	20-Jun-2011	-21.7	-68.23	SKS	NULL	NULL	NULL	NULL	NULL	NULL	-0.167981	-0.11572	-0.0634583	-	no	64.6986	1.04342	-	0.0666667	0.24
VRF	67.748	29.609	29-Jul-2011	-23.78	179.76	SKKS	NULL	NULL	NULL	NULL	NULL	NULL	0.0308877	0.105958	0.181029	-	no	76.1672	96.572	-	0.0666667	0.18
VRF	67.748	29.609	29-Jul-2011	-23.78	179.76	SKS	NULL	NULL	NULL	NULL	NULL	NULL	0.0408303	0.116966	0.193101	-	no	73.2184	46.4336	-	0.0666667	0.18
VRF	67.748	29.609	22-Nov-2011	-15.36	-65.09	SKKS	NULL	NULL	NULL	NULL	NULL	NULL	-0.133951	-0.0332854	0.0673798	-	no	55.7341	-21.7497	-	0.0666667	0.26
VRF	67.748	29.609	22-Nov-2011	-15.36	-65.09	SKS	NULL	NULL	NULL	NULL	NULL	NULL	0.122617	0.181293	0.239969	-	no	63.8811	-2.11804	-	0.0666667	0.26
VRF	67.748	29.609	20-Oct-2015	-14.84	167.31	SKKS	-1.01124	15.039	27.3034	0.7	1	1.3	-1.01166	-0.938312	-0.864963	-	no	71.4437	100.028	-	0.0666667	0.2
VRF	67.748	29.609	20-Oct-2015	-14.84	167.31	SKS	5.05618	15.039	23.2584	0.7	0.9	1.1	-0.862666	-0.787496	-0.712327	-	no	72.6987	56.122	-	0.0666667	0.2
VRF	67.748	29.609	25-Jul-2016	-26.11	-70.65	SKKS	NULL	NULL	NULL	NULL	NULL	NULL	0.0776719	0.150087	0.222503	-	no	57.4035	-19.3161	-	0.0666667	0.2
VRF	67.748	29.609	25-Jul-2016	-26.11	-70.65	SKS	NULL	NULL	NULL	NULL	NULL	NULL	-0.179348	-0.0945379	-0.00972818	-	no	65.2244	3.32029	-	0.0666667	0.2
VRF	67.748	29.609	04-Aug-2016	-22.33	-66	SKKS	NULL	NULL	NULL	NULL	NULL	NULL	-0.0364932	0.044983	0.126459	-	no	55.9885	-19.1334	-	0.0666667	0.2
VRF	67.748	29.609	04-Aug-2016	-22.33	-66	SKS	NULL	NULL	NULL	NULL	NULL	NULL	0.114818	0.176411	0.238004	-	no	64.2729	1.53884	-	0.0666667	0.2
VRF	67.748	29.609	31-Aug-2016	-3.69	152.79	SKKS	-7.07865	12.0568	37.4157	0.7	1.1	1.5	-0.896166	-0.77795	-0.659734	-	no	66.0162	100.173	-	0.0666667	0.2
VRF	67.748	29.609	31-Aug-2016	-3.69	152.79	SKS	27.3034	32.0568	37.4157	1	1.2	1.4	-1.02324	-0.948551	-0.873859	-	no	70.7409	67.678	-	0.0666667	0.2
VSTU	57.66	16.5363	21-Sep-2013	-7.26	119.96	SKS	-75.8427	-47.4964	-29.3258	0.4	0.56	0.82	0.589259	0.638962	0.688664	0.424338	yes	56.7495	42.7979	-	0.0666667	0.2
VSTU	57.66	16.5363	21-Sep-2013	-7.26	119.96	SKKS	NULL	NULL	NULL	NULL	NULL	NULL	0.000827429	0.0828743	0.164921	0.424338	yes	51.8525	62.5908	-	0.0666667	0.2
